# Supplementary material for: Perceptions on undertaking regular asymptomatic self-testing for COVID-19 using lateral flow tests: a qualitative study of university students and staff
Source: PubMed Central journal article supplement — BMJ Open. 2021 Sep 2;11(9):e053850. doi: 10.1136/bmjopen-2021-053850 (PMC8413471; doi:10.1136/bmjopen-2021-053850), 2021-09-02
Supplement: bmjopen-2021-053850.draft_revisions.pdf [file bmjopen-2021-053850.draft_revisions.pdf]

# BMJ Open

BMJ Open is committed to open peer review. As part of this commitment we make the peer review history of every article we publish publicly available.

When an article is published we post the peer reviewers' comments and the authors' responses online. We also post the versions of the paper that were used during peer review. These are the versions that the peer review comments apply to.

The versions of the paper that follow are the versions that were submitted during the peer review process. They are not the versions of record or the final published versions. They should not be cited or distributed as the published version of this manuscript.

BMJ Open is an open access journal and the full, final, typeset and author-corrected version of record of the manuscript is available on our site with no access controls, subscription charges or pay-per-view fees (<http://bmjopen.bmj.com>).

If you have any questions on BMJ Open's open peer review process please email [info.bmjopen@bmj.com](mailto:info.bmjopen@bmj.com)

# BMJ Open

## Perceptions on undertaking regular asymptomatic self-testing for COVID-19 using lateral flow tests: A qualitative study of university students and staff

|                               |                                                                                                                                                                                                                                                                                                                                                                                                                                                                                                                                                                                                                                                                                                                                                                                                                                                                                                                                                                                                                                                                                                                                                                                                                                                                                                                                                                                                                                                                                                                                                                                                                                                                                                                                                                                                                                                                                                                                                                                                                                        |
|-------------------------------|----------------------------------------------------------------------------------------------------------------------------------------------------------------------------------------------------------------------------------------------------------------------------------------------------------------------------------------------------------------------------------------------------------------------------------------------------------------------------------------------------------------------------------------------------------------------------------------------------------------------------------------------------------------------------------------------------------------------------------------------------------------------------------------------------------------------------------------------------------------------------------------------------------------------------------------------------------------------------------------------------------------------------------------------------------------------------------------------------------------------------------------------------------------------------------------------------------------------------------------------------------------------------------------------------------------------------------------------------------------------------------------------------------------------------------------------------------------------------------------------------------------------------------------------------------------------------------------------------------------------------------------------------------------------------------------------------------------------------------------------------------------------------------------------------------------------------------------------------------------------------------------------------------------------------------------------------------------------------------------------------------------------------------------|
| Journal:                      | <i>BMJ Open</i>                                                                                                                                                                                                                                                                                                                                                                                                                                                                                                                                                                                                                                                                                                                                                                                                                                                                                                                                                                                                                                                                                                                                                                                                                                                                                                                                                                                                                                                                                                                                                                                                                                                                                                                                                                                                                                                                                                                                                                                                                        |
| Manuscript ID                 | bmjopen-2021-053850                                                                                                                                                                                                                                                                                                                                                                                                                                                                                                                                                                                                                                                                                                                                                                                                                                                                                                                                                                                                                                                                                                                                                                                                                                                                                                                                                                                                                                                                                                                                                                                                                                                                                                                                                                                                                                                                                                                                                                                                                    |
| Article Type:                 | Original research                                                                                                                                                                                                                                                                                                                                                                                                                                                                                                                                                                                                                                                                                                                                                                                                                                                                                                                                                                                                                                                                                                                                                                                                                                                                                                                                                                                                                                                                                                                                                                                                                                                                                                                                                                                                                                                                                                                                                                                                                      |
| Date Submitted by the Author: | 26-May-2021                                                                                                                                                                                                                                                                                                                                                                                                                                                                                                                                                                                                                                                                                                                                                                                                                                                                                                                                                                                                                                                                                                                                                                                                                                                                                                                                                                                                                                                                                                                                                                                                                                                                                                                                                                                                                                                                                                                                                                                                                            |
| Complete List of Authors:     | <p>Wanat, Marta; University of Oxford; University of Oxford, Nuffield Department of Primary Care Health Sciences</p> <p>Logan, Mary; University of Oxford, Nuffield Department of Primary Care Health Sciences; National Institute for Health Research Oxford Biomedical Research Centre, University of Oxford Hospitals NHS Foundation Trust</p> <p>Hirst, Jennifer; University of Oxford, Nuffield Department of Primary Care Health Science; National Institute for Health Research Oxford Biomedical Research Centre, University of Oxford Hospitals NHS Foundation Trust</p> <p>Vicary, Charles; University of Oxford, Nuffield Department of Primary Care Health Sciences</p> <p>Lee, Joseph; University of Oxford, Nuffield Department of Primary Care Health Sciences</p> <p>Perera, Rafael; University of Oxford, Nuffield Department of Primary Care Health Sciences; National Institute for Health Research Oxford Biomedical Research Centre, , University of Oxford Hospitals NHS Foundation Trust</p> <p>Tracey, Irene; University of Oxford, Merton College</p> <p>Duff, Gordon; University of Oxford, St Hilda's College</p> <p>Tufano, Peter; University of Oxford, Saïd Business School</p> <p>Fanshawe, Thomas; University of Oxford, Nuffield Department of Primary Care Health Sciences</p> <p>Mwandigha, Lazaro; University of Oxford, Nuffield Department of Primary Care Health Sciences</p> <p>Nicholson, Brian; University of Oxford, Nuffield Department of Primary Care Health Sciences</p> <p>Tonkin-Crine, Sarah ; University of Oxford, Nuffield Department of Primary Care Health Sciences; NIHR Health Protection Research Unit in Healthcare Associated Infections and Antimicrobial Resistance, University of Oxford in Partnership with Public Health England</p> <p>Hobbs, Richard; University of Oxford, Nuffield Department of Primary Care Health Science; National Institute for Health Research Oxford Biomedical Research Centre, , University of Oxford Hospitals NHS Foundation Trust</p> |
| Keywords:                     | COVID-19, Public health < INFECTIOUS DISEASES, QUALITATIVE RESEARCH                                                                                                                                                                                                                                                                                                                                                                                                                                                                                                                                                                                                                                                                                                                                                                                                                                                                                                                                                                                                                                                                                                                                                                                                                                                                                                                                                                                                                                                                                                                                                                                                                                                                                                                                                                                                                                                                                                                                                                    |

1  
2  
3  
4  
5  
6  
7  
8  
9  
10  
11  
12  
13  
14  
15  
16  
17  
18  
19  
20  
21  
22  
23  
24  
25  
26  
27  
28  
29  
30  
31  
32  
33  
34  
35  
36  
37  
38  
39  
40  
41  
42  
43  
44  
45  
46  
47  
48  
49  
50  
51  
52  
53  
54  
55  
56  
57  
58  
59  
60

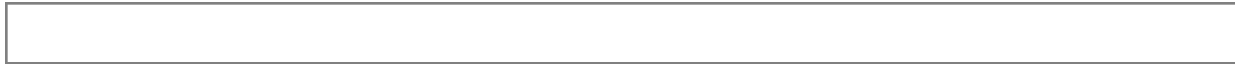

SCHOLARONE™  
Manuscripts

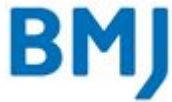

I, the Submitting Author has the right to grant and does grant on behalf of all authors of the Work (as defined in the below author licence), an exclusive licence and/or a non-exclusive licence for contributions from authors who are: i) UK Crown employees; ii) where BMJ has agreed a CC-BY licence shall apply, and/or iii) in accordance with the terms applicable for US Federal Government officers or employees acting as part of their official duties; on a worldwide, perpetual, irrevocable, royalty-free basis to BMJ Publishing Group Ltd ("BMJ") its licensees and where the relevant Journal is co-owned by BMJ to the co-owners of the Journal, to publish the Work in this journal and any other BMJ products and to exploit all rights, as set out in our [licence](#).

The Submitting Author accepts and understands that any supply made under these terms is made by BMJ to the Submitting Author unless you are acting as an employee on behalf of your employer or a postgraduate student of an affiliated institution which is paying any applicable article publishing charge ("APC") for Open Access articles. Where the Submitting Author wishes to make the Work available on an Open Access basis (and intends to pay the relevant APC), the terms of reuse of such Open Access shall be governed by a Creative Commons licence – details of these licences and which [Creative Commons](#) licence will apply to this Work are set out in our licence referred to above.

Other than as permitted in any relevant BMJ Author's Self Archiving Policies, I confirm this Work has not been accepted for publication elsewhere, is not being considered for publication elsewhere and does not duplicate material already published. I confirm all authors consent to publication of this Work and authorise the granting of this licence.

1  
2  
3 **Title: Perceptions on undertaking regular asymptomatic self-testing for COVID-19 using lateral flow**  
4 **tests: A qualitative study of university students and staff**  
5

6  
7 **Authors:** Marta Wanat<sup>1</sup>, Mary Logan<sup>1,2</sup>, Jennifer A. Hirst<sup>1,2</sup>, Charles Vicary<sup>1</sup>, Joseph Jonathan Lee<sup>1</sup>,  
8 Rafael Perera<sup>1,2</sup>, Irene Tracey<sup>3</sup>, Gordon Duff<sup>4</sup>, Peter Tufano<sup>5</sup>, Thomas R. Fanshawe<sup>1</sup>, Lazaro  
9 Mwandigha<sup>1</sup>, Brian D. Nicholson<sup>1</sup>, Sarah Tonkin-Crine<sup>1\*</sup>, FD Richard Hobbs<sup>\*1,2</sup>.  
10  
11

12  
13 \*Joint senior authors  
14  
15  
16

17  
18 <sup>1</sup>Nuffield Department of Primary Care Health Science, University of Oxford, Radcliffe Observatory  
19 Quarter, Woodstock Road, Oxford, OX2 6GG

20  
21 <sup>2</sup> National Institute for Health Research (NIHR) Oxford Biomedical Research Centre, University of  
22 Oxford Hospitals NHS Foundation Trust, Oxford, UK.

23  
24 <sup>3</sup>Merton College, University of Oxford, Merton Street, Oxford, OX1 4JD

25  
26 <sup>4</sup>St Hilda's College, University of Oxford, Cowley Place, Oxford, OX4 1DY

27  
28 <sup>5</sup>Saïd Business School, University of Oxford, Park End Street, Oxford OX1 1HP

29  
30 <sup>6</sup>NIHR Health Protection Research Unit in Healthcare Associated Infections and Antimicrobial  
31 Resistance, University of Oxford in Partnership with Public Health England, Oxford, UK  
32  
33

34  
35 Corresponding author pre-publication: Marta Wanat, Nuffield Department of Primary Care Health  
36 Science, University of Oxford, Radcliffe Observatory Quarter, Woodstock Road, Oxford, OX2 6GG,  
37 email: [marta.wanat@phc.ox.ac.uk](mailto:marta.wanat@phc.ox.ac.uk); Tel: +4401865617935  
38

39  
40 Corresponding author post-publication: FD Richard Hobbs, Nuffield Department of Primary Care  
41 Health Science, University of Oxford, Radcliffe Observatory Quarter, Woodstock Road, Oxford, OX2  
42 6GG, [richard.hobbs@phc.ox.ac.uk](mailto:richard.hobbs@phc.ox.ac.uk)  
43  
44

45 Key words: qualitative; testing; POCT; COVID-19

46  
47 Word count: 3074  
48  
49  
50  
51  
52  
53  
54  
55  
56  
57  
58  
59  
60

## Abstract

### Background

Successful implementation of asymptomatic testing programmes using Lateral Flow Tests (LFTs) depends on several factors, including feasibility, acceptability and how people act on test results. We aimed to examine experiences of university students and staff of regular asymptomatic self-testing using LFTs, and their subsequent behaviours.

### Methods

We conducted semi-structured remote interviews with people who were participating in weekly testing' feasibility study, between December 2020 and January 2021. Additional qualitative data from a survey were also analysed. Data were analysed thematically.

### Results

We interviewed 18 and surveyed 214 participants. Participants were motivated to regularly self-test as they wanted to know whether or not they were infected with SARS-CoV-2. Most reported that a negative test result did not change their behaviour but it did provide them with reassurance to engage with permitted activities. In contrast, some participants reported making decisions about visiting other people because they felt reassured by a negative test result. Participants valued the training but some still doubted their ability to carry out the test. Participants were concerned about safety of attending test sites with lots of people and reported home testing was most convenient.

### Conclusions

Clear messages highlighting the benefits of regular testing for family, friends and society in identifying asymptomatic cases are needed. This should be coupled with transparent communication about accuracy of LFTs and how to act on either a positive or negative result. Concerns about safety, convenience of testing, and ability to do tests need to be addressed to ensure successful scaling up asymptomatic testing.

Keywords: qualitative; testing; POCT; COVID-19

**Article summary**

- A unique study exploring people's experiences of regular asymptomatic self-testing including views and understanding of the accuracy of LFT tests
- Our analysis highlights a number of barriers which need to be address to ensure successful scaling up of asymptomatic testing
- Data represent the views of staff and university students who agreed to take part and their motivation to participate and perceived benefits of testing may be different from those in the wider university population, and other non-university settings.

Peer review only

## Introduction

Recent data showing that 1 in 3 people infected with SARS-CoV-2 may not show symptoms, prompted an increased interest from governments in the feasibility of testing asymptomatic individuals using lateral flow tests (LFT)<sup>1</sup>. In fact, in a number of countries<sup>2,3</sup>, including the UK<sup>4</sup>, these devices are part of government strategies for easing of lockdowns. The Liverpool Testing Programme was one of the first to examine, alongside the accuracy of LFTs, the feasibility and acceptability of such programmes in an area with high COVID-19 prevalence<sup>5</sup>. University campuses were also identified as potential sites of high COVID-19 transmission<sup>6</sup>, which resulted in pilot studies in a number of universities testing asymptomatic populations<sup>7,8</sup>.

Asymptomatic testing (screening) has attracted a lot of attention, with many highlighting that LFTs can give people false reassurance<sup>9-11</sup>, and others stressing that targeted testing could help reduce transmission<sup>10,12</sup>. As there are no clinical trials of SARS-CoV-2 screening, there is uncertainty of the effect. The supposition is that identifying positive cases willing to go on to self-isolate rapidly and cheaply could reduce infections more than any increase in infections from falsely reassuring people with false negative results. Furthermore, repeat testing with LFTs for SARS-CoV-2 infections, if shown to be feasible, will markedly improve the relatively poor sensitivity of the tests. For any given test, people's behaviours will determine this balance. Screening pilots usually request that participants do not change their behaviour as a result of being tested and receiving a negative result. The evidence from point-of-care tests for other conditions is that tests are part of complex interventions that change behaviours in unpredictable ways<sup>15</sup>. Evidence is therefore needed on participant perceptions on the use of COVID-19 LFTs.

Few studies have examined acceptability and feasibility of asymptomatic testing in the community<sup>5</sup> using PCR tests<sup>8,13</sup> and even fewer have focussed on these issues in relation to regular testing (rather than one-off)<sup>9</sup> and LFT testing. People's views and understanding of the accuracy of such tests have also not been explored. Our study aimed to address this gap by examining experiences of university students and staff of regular self-testing using LFTs with the aim of identifying key lessons for future asymptomatic testing programmes.

## Methods

### Study recruitment

The 'Feasibility and Acceptability of community COVID-19 Testing Strategies' (FACTS) study was a mixed methods cohort study conducted at the University of Oxford. University students and staff



1  
2  
3 were invited to participate in the study to take part in regular testing. The study used the Innova Rapid  
4 SARS-CoV-2 Antigen Test Kit (Innova Medical Group, US)<sup>14</sup> Participants were invited to a training  
5 session, conducted face-to-face or online, before undertaking weekly testing. Details of training are  
6 reported elsewhere<sup>15</sup>. The PIS informed participants that rapid tests are not as reliable as, or a  
7 replacement for, a PCR test and that they should follow standard infection prevention  
8 procedures. While the original plan was to provide all participants with the testing kits to take home,  
9 this was not possible in the initial stages of the study and meant that some participants had to attend  
10 their work or study site for testing for several weeks.  
11  
12  
13  
14  
15  
16  
17

### 18 Interview recruitment and data collection

19  
20 A selection of participants who agreed to be contacted about an interview at the study enrolment,  
21 were invited via email, using purposive sampling, in order to obtain variation in university role (student  
22 or staff) and department. A semi-structured interview guide was developed based on the primary  
23 research questions (Appendix 1). Participants were asked about their views and experiences of using  
24 the tests, their reasons for taking part in the study, barriers and facilitators to undertaking regular  
25 testing, trust in test results and intentions to act on a positive result. After obtaining consent,  
26 interviews were conducted over the telephone or online and audio recorded by a senior female  
27 postdoctoral qualitative researcher (MW). Interviews continued until data indicated saturation<sup>16</sup> As  
28 part of the wider study, we also conducted a survey examining participants' views of regular testing.  
29 The survey consisted of 13 questions (Appendix 2) and a free text comment box. The survey was sent  
30 to all study participants via email.  
31  
32  
33  
34  
35  
36  
37  
38  
39

### 40 Data analysis

41  
42 Based on the free text comments from the survey, MW and STC created an initial framework consisting  
43 of nine categories that captured key areas of interest. Using this framework, detailed summaries of  
44 interview data, including verbatim quotes, were made directly from the audio recording after each  
45 interview<sup>17</sup> These were further changed and then used to create themes and sub-themes. This method  
46 is deemed a pragmatic and efficient approach to collect and analyse data rapidly during a public health  
47 emergency<sup>18</sup>.  
48  
49  
50  
51  
52

### 53 Patient and Public Involvement

54  
55 This study was rapidly set up and therefore did not include any PPI input. All participants will receive  
56 a summary of the results.  
57  
58  
59  
60

## Results

734 participants across a number of departments and colleges took part in the study (October 2020 to January 2021) and performed 3187 LFT tests. Participants completed a mean of 4.3 tests over a mean of 4.8 weeks<sup>15</sup>.

431 of 733 (59%) participants indicated on the consent form that they would be interested in taking part in an interview. Fifty-two were approached and 18 interviews were conducted (response rate 35%). Of these, 3 were undergraduate students, 3 were postgraduate students and 12 were staff. Each interview participant had completed between 3 and 10 tests during the whole study period (mean 7.7). The interviews took place between 11<sup>th</sup> December 2020 and 18<sup>th</sup> January 2021 and lasted between 17 and 43 minutes (mean 26 minutes). In addition, 214 participants completed the survey (29%); 62 provided additional free text comments. Each survey participant completed between 1 and 13 tests (mean=5.8).

We identified four themes, which we report below with supporting quotes.

### Theme 1: Perceived benefits to regular testing

Participants reported three main benefits of taking part in the study and having access to regular self-testing. Firstly, they wanted to check regularly whether or not they were infected with SARS-CoV-2, to reduce their fear of unknowingly infecting others, which was a concern they mentioned frequently. In addition, participants wanted to know if they were infected so they could take appropriate action, i.e. self-isolate and thus minimise the risk of spreading the virus.

Secondly, some students highlighted that deciding to self-test with a LFT was perceived as a personal choice and therefore more acceptable than undertaking NHS or university testing when experiencing symptoms. The university protocol for symptomatic testing required everyone in the household to enter into isolation at the time of getting a test rather than at the time of getting a positive result. As participants explained, peer pressure may prevent people from doing NHS or university testing.

*Getting an NHS test is such an ordeal and in a university context, there is pressure not to get tested because getting that test puts your whole house into a lockdown. This test removes barriers [...] You do it as a personal choice and not something where you get permission from the whole household to get tested [P2, Student, Interview]*

Finally, all interviewees wanted to support COVID-19 research to contribute to fighting the pandemic.

## Theme 2: Perceptions of test accuracy and its implications

Overall, participants mostly accepted that tests were not 100% accurate. They saw them as just one of the measures to try to avoid spreading the virus (among social distancing, face masks and vaccines in the future). Some participants sought their own information on the accuracy of LFTs in general or had heard information from family and friends. The perceived accuracy varied greatly, with participants citing figures between 50 and 90%. It is important to highlight that often the same figure was seen as reassuring by some participants, and less so by others and some participants lacked any recalled information on accuracy of the tests.

*I am sceptical because someone who works in the industry told me that some hospital stopped using the tests because with poor training it has an effectiveness rate of 50% [P19, Student, Interview]*

*I talked to a friend who is a nurse; and she said that they are around 60% which is a decent percentage to be accurate [P18, Staff, Interview]*

Participants' views on test accuracy were important when making decisions about their behaviour. Participants did not view a negative test result as permission to break government guidelines, but reported that negative tests increased their confidence to engage with activities that were allowed.

*I am not sure [the test result] changed our behaviour but it reassured us that I am going to have two tests during that time and if they are both negative that gives you a bit of reassurance that this is a reasonable thing to do [P11, Staff, Interview]*

Crucially, some participants did make decisions, based on negative test results, about engaging with activities where there was potential for transmission (for example seeing a relative or extent of contact with relatives at home) because they were unaware about tests not being 100% accurate. When later learning that tests were not 100% accurate, participants were concerned about their decisions.

*I have read online about the reliability of the tests and initially that gave me a lot of confidence. [...] and when I had a negative test I felt that I could go and have a cup of tea with a relative and then I read that the reliability was [...] so some of the figures were down in the 50s or 60s, so 60% and then you thought 'oh this is not that reassuring [P14, Staff, Interview]*

*I have done all these tests which were negative and after the 3rd test I was less careful for sure [P5, Student, Interview]*

1  
2  
3 Finally, some participants were unsure whether the information they had read about LFTs was  
4 relevant to the test they had been using. They highlighted the difficulty of making a decision on  
5 whether to engage with certain (allowed) activities or not.  
6  
7

8  
9 *I read in the newspapers that when done by trained medical staff the tests are only 75%*  
10 *accurate, and by non-medical staff 50%. [...] So if I have 50-50 success rate is that a good*  
11 *thing or is it better not to know [P3, Staff, Interview]*  
12  
13

### 14 **Theme 3: Extent of confidence in ability to do the tests**

15  
16 The majority of participants felt that the training they received enabled them to feel confident about  
17 doing the tests. While doing tests repeatedly increased participants' confidence, a number of  
18 participants were still unsure whether they were doing the test correctly, especially the tonsil swab.  
19 Some questioned whether an incorrect swab would make test less reliable.  
20  
21  
22

23  
24 *I have very strong gag reflex so I am unable to reach my tonsils.[...] I have not been able to*  
25 *get an answer on whether it is important to swab the tonsils [P8, Staff, Interview]*  
26  
27

28  
29 Doing the tests at home was easier as participants had access to mirrors rather than having to rely  
30 on their phone cameras to do the test on site. When doing tests at home, having a card which  
31 summarised the instructions was also suggested, as instead participants had to re-watch the video  
32 every time they were unsure about some aspect of the self-testing. In contrast, doing tests on site  
33 was perceived as helpful by some participants as they could ask other participants for tips, seeing  
34 other people experience physical sensation and check whether they "were doing it right".  
35  
36  
37  
38  
39  
40

### 41 **Theme 4: Barriers and facilitators to regular testing**

42  
43 All interviewees experienced swabbing as uncomfortable, at least to a certain extent, with some  
44 reporting having a strong gag reflex and testing causing sneezing or watering eyes. However, most  
45 participants highlighted that these sensations were temporary, manageable and were a "small price  
46 to pay" for getting reassurance on whether they were infected (as described in theme 1).  
47  
48  
49

50  
51 Participants who were able to take a number of testing kits home seemed to see testing as relatively  
52 easy to fit tests into their weekly routine. In contrast, for participants who did not get packs to take  
53 home and who had to go to their department to self-test, it was an inconvenience and caused  
54 frustration, especially as testing took place over several weeks. This was especially the case for staff.  
55  
56  
57  
58  
59  
60

1  
2  
3 While training in a group was perceived as beneficial (as described in theme 2), some participants  
4 were also concerned about the safety of getting tested on site, around other people, especially if  
5 they had not been going out much.  
6  
7

8  
9 *It was quite frustrating that we were expected to conduct the test in person in a lecture hall*  
10 *with many other students for the first few weeks, as this was the biggest personal risk I took*  
11 *[P10, Student, Survey].*  
12  
13

14 Finally, participants wanted a reminder to do the test when it was due each week, and some felt this  
15 could provide additional encouragement.  
16  
17

## 18 **Discussion**

19  
20 We found that interviewees were motivated to conduct regular testing as they wanted to know  
21 whether or not they were infected with SARS-CoV-2. While most participants accepted that the test  
22 was not 100% accurate, many could not quantify this further and estimates of test accuracy varied  
23 greatly among participants. Importantly, most reported that a negative test result did not change their  
24 behaviour but some participants reported making decisions about contact with other people when  
25 they would not have done otherwise, because they felt reassured by a negative test result.  
26 Participants valued the training but some participants still doubted their ability to do the test.  
27 Participants also raised the importance of safety and convenience when attending for tests on site.  
28  
29  
30  
31  
32  
33

### 34 *Comparison with existing literature*

35  
36 Participants in our study wanted to have regular testing to reduce their fear of accidentally infecting  
37 their family, friends or other people in their community, while also wanting to contribute to fighting  
38 the pandemic. This is in line with the Liverpool COVID-SMART study, which found that people signed  
39 up to have a test as they wanted to protect their families, friends as well as local hospitals and NHS  
40 workers<sup>5</sup>. Only one study in a university setting explored these issues, albeit involving RT-PCR tests,  
41 and also reported similar reasons<sup>7</sup>. Our study also highlights the importance of the perceived benefits  
42 but in the context of regular rather than one-off testing and using LFTs. It also suggests that  
43 asymptomatic testing using LFTs may be perceived as more accessible and acceptable for students, in  
44 comparison to NHS or University testing, which has not been identified before.  
45  
46  
47  
48  
49  
50  
51

52  
53 Importantly, our study found that while most participants understood that the test was “not 100%  
54 accurate”, estimates of test accuracy varied greatly among participants. Most reported that negative  
55 test results did not change their behaviour but it did provide them with reassurance to engage with  
56 permitted activities. However, some participants felt reassured by the test and reported making  
57 decisions involving contact with other people, when they would not have done otherwise. Previous  
58  
59  
60

1  
2  
3 studies have only explored these issues for antibody testing<sup>19</sup>. Liverpool COVID-SMART study  
4 indicated that some participants had concerns about test accuracy<sup>5</sup> and one study in a university  
5 setting found that 79.6% of participants were confident in the outcome of their PCR test<sup>7</sup>. Our study  
6 highlights that people's understanding of the extent to which LFTs are accurate varied, with  
7 potential implications for their behaviour.  
8  
9

10  
11  
12 Finally, while our participants described swabbing as being uncomfortable, they felt that the perceived  
13 benefits outweighed the burden of doing the tests. Having access to a number of tests which they  
14 could do at home made it easier for participants to take part, while doing the testing on site provided  
15 an opportunity for feedback on how well participants were doing the test but magnified safety  
16 concerns. Misinformation related to perception of the risk of infection at test sites, and the need to  
17 have physical contact with centre staff, have been described before<sup>5</sup>  
18  
19  
20  
21

### 22 23 *Strengths and limitations*

24  
25 This first qualitative study examining views and experiences of students and staff of regular  
26 asymptomatic SARS-CoV-2 testing in a university setting using LFTs highlights a number of key issues  
27 related to acceptability and feasibility of regular testing as well as its behavioural implications. We  
28 note some limitations. The mean number of tests conducted by each interview and survey  
29 participant was higher than the mean number of tests in non-interviewed participants, so our  
30 sample may over-represent those who continued to test regularly. Additionally, the FACTS  
31 participants were university student and staff volunteers, whose motivation to participate and  
32 perceived benefits may be different from those in the wider university population, and other non-  
33 university settings.  
34  
35  
36  
37  
38  
39

### 40 41 *Implications for policy and practice*

42  
43 Our study indicates that messages highlighting the benefits for family, friends and society in  
44 identifying asymptomatic cases and contributing to fighting the pandemic and ultimately lifting  
45 lockdowns might be beneficial for encouraging regular use of LFTs<sup>20</sup>. However, these need to be  
46 coupled with clear and transparent communication about accuracy of LFTs. Also, given that the same  
47 reported accuracy of the test might be perceived by different people as more or less favourable, it is  
48 crucial that this is framed within clear messages on what it means for an individual's behaviour (i.e.  
49 the need to follow COVID-19 safety measures). This is especially important for testing in workplaces  
50 or schools (as currently planned in the UK<sup>21</sup>) where a negative test may allow people to return to  
51 their study or workplace and will consequently involve contact with other people. Advice that  
52 supports people to continue physical distancing, hand hygiene and mask wearing in the context of a  
53  
54  
55  
56  
57  
58  
59  
60

1  
2  
3 negative test is crucial. A recent report of implementation of asymptomatic testing in local  
4 authorities in England showed that 47% of local authority websites did not explain the limitations of  
5 LFTs or that people should continue following safety measures despite a negative result<sup>11</sup> and  
6 highlighted a lack of standard messaging on test accuracy<sup>11</sup>.  
7  
8  
9

10 When scaling up regular asymptomatic testing, it is important to also consider potential concerns  
11 about convenience of testing, and people's confidence and ability to do the testing. In settings  
12 where people may be tested on site, safety and convenience may be important to consider.  
13 Concerns about physical sensations also need to be addressed. Whereas, for those who are sent  
14 tests to take at home, clear information on testing procedures and a reminder to take the test will  
15 be of importance.  
16  
17  
18  
19  
20

## 21 **Conclusions**

22 Clear messages highlighting the benefits of regular testing for family, friends and society in  
23 identifying asymptomatic cases are needed. This should be coupled with transparent communication  
24 about accuracy of LFTs and how to act on either a positive or negative result. Concerns about safety,  
25 convenience of testing, and ability to do tests need to be addressed to ensure successful scaling up  
26 asymptomatic testing.  
27  
28  
29  
30  
31

## 32 **Funding statement:**

33 This study has received an internal funding from the University of Oxford (no grant number)  
34  
35  
36

## 37 **Ethics Approval Statement:**

38 It was approved by the University of Oxford Research Ethics Committee in October 2020 (CUREC  
39 ethics reference R72896/RE001).  
40  
41  
42  
43

## 44 **Data sharing statement:**

45 Data available on reasonable request.  
46  
47

## 48 **Contributorship statement:**

49 MW designed the study, undertook data collection and analysis, and co-wrote the manuscript. ML  
50 designed the study and critically appraised the manuscript. JAH designed the study, contributed to  
51 the analysis and critically appraised the manuscript. CV, JAH, RP, IT, GD, and PT designed the study  
52 and critically appraised the manuscript. TRF and LM designed the study, contributed to the analysis  
53 and critically appraised the manuscript. BDN designed the study and critically appraised the  
54  
55  
56  
57  
58  
59  
60

manuscript. STC contributed to data analysis and co-writing of the manuscript. FDRH designed the study and critically appraised the manuscript.

## References

1. Gandhi M, Yokoe DS, Havlir DV. Asymptomatic Transmission, the Achilles' Heel of Current Strategies to Control Covid-19. *2020*;382(22):2158-60. doi: 10.1056/NEJMe2009758
2. European Centre for Disease Prevention and Control. Population-wide testing of SARS-CoV-2: country experiences and potential approaches in the EU/EEA and the United Kingdom. Stockholm: ECDC, 2020.
3. Holt E. Slovakia to test all adults for SARS-CoV-2. *The Lancet* 2020;396(10260):1386-87.
4. Department of Health and Social Care. Asymptomatic testing to be rolled out across the country starting this week. London, 2021.
5. University of Liverpool. Liverpool COVID-19 Community Testing Pilot: University of Liverpool, 2020.
6. Weeden KA, Cornwell BJS. The small-world network of college classes: implications for epidemic spread on a university campus. *2020*;7:222-41.
7. Blake H, Corner J, Cirelli C, et al. Perceptions and Experiences of the University of Nottingham Pilot SARS-CoV-2 Asymptomatic Testing Service: A Mixed-Methods Study. *Int J Environ Res Public Health* 2020;18(1):188. doi: 10.3390/ijerph18010188
8. Blake H, Knight H, Jia R, et al. Students' Views Towards SARS-CoV-2 Mass Asymptomatic Testing, Social Distancing and Self-Isolation in a University Setting during the COVID-19 Pandemic: A Qualitative Study. 2021
9. Gill M, Gray M. Mass testing for covid-19 in the UK. *2020*;371:m4436. doi: 10.1136/bmj.m4436 %J BMJ
10. Kmietowicz Z. Covid-19: Controversial rapid test policy divides doctors and scientists. *2021*;372:n81. doi: 10.1136/bmj.n81 %J BMJ
11. Mahase E. Covid-19: People are not being warned about pitfalls of mass testing: British Medical Journal Publishing Group, 2021.
12. Limb M. Covid-19: Use lateral flow tests in schools to find cases, urges Independent SAGE. *2021*;372:n75. doi: 10.1136/bmj.n75 %J BMJ
13. Gillam TB, Cole J, Gharbi K, et al. Norwich COVID-19 testing initiative pilot: evaluating the feasibility of asymptomatic testing on a university campus. *Journal of Public Health* 2020 doi: 10.1093/pubmed/fdaa194
14. Solution IMGs-C-AT. 2020 [Available from: [https://innovamedgroup.com/antigen\\_testing/](https://innovamedgroup.com/antigen_testing/)].
15. Hirst J, Logan, M., Fanshawe, T., Mwandigha, L., Wanat, M., Vicary, C. et al. Feasibility and Acceptability of community COVID-19 Testing Strategies (FACTS) in a University setting. Submitted to BMJ.
16. Fusch PN, L. Are we there yet? Data saturation in qualitative research. *The qualitative report* 2015;20(9):1408.
17. Vindrola-Padros C, Chisnall G, Cooper S, et al. Carrying Out Rapid Qualitative Research During a Pandemic: Emerging Lessons From COVID-19. *2020*;30(14):2192-204. doi: 10.1177/1049732320951526
18. Johnson GA, Vindrola-Padros CJSS, Medicine. Rapid qualitative research methods during complex health emergencies: a systematic review of the literature. *2017*;189:63-75.
19. Lecouturier J, Kelly MP, Graham F, et al. Public understanding of COVID-19 antibody testing and test results: A qualitative study conducted in the U.K. early in the pandemic. *Social Science & Medicine* 2021:113778. doi: <https://doi.org/10.1016/j.socscimed.2021.113778>
20. Freeman D, Loe BS, Chadwick A, et al. COVID-19 vaccine hesitancy in the UK: the Oxford coronavirus explanations, attitudes, and narratives survey (Oceans) II. *2020*:1-15.



21. Zeffman H, Smyth, C. & Swinford, S. . Mass testing blitz as Boris Johnson plans easing of lockdown. *The Times* 2021. <https://www.thetimes.co.uk/article/hz-splash-17-hsc-xz3dpdnvx?shareToken=57f3f5ae21d3915ef6d28182e401150e>.

For peer review only

## Appendix

### Appendix 1: Topic Guide

#### Topics to be explored

Below is a list of topics to be discussed in this study. The work will remain flexible with respect to participants' agendas. Therefore, we may add new topics as the interviews progress and data collection continues. However, the key topic of participants' views and experiences using the tests, the perceived benefits of testing, barriers and facilitators to undertaking regular testing, trust in test results and intentions to act on positive result, will remain the same.

1. Participants' views and experiences of using the tests.
2. Participants' views and experiences on barriers and facilitators to undertaking regular testing
3. Participants' views on trust in test results.
4. Participants' views and experiences of perceived benefits of testing
5. Participants' intentions to act on positive result.

#### Using the tests

1. Can you tell me about your experience of self-testing for COVID so far?
2. Can you tell me about the training you had on how to self-test, as part of the FACT study?  
Prompts: What did the training involve? What did you think about the training? Is there anything which would make the training easier for you? How confident did you feel about doing the test?
3. How did you feel about doing the test for the first time?
4. How have you found self-testing over time?  
Prompts: Have you had any difficulties in doing the test? If, so what happened and what did you do? How did you overcome difficulties?

#### Barriers and facilitators to undertaking regular testing; perceived benefits of testing

1. Can you tell me why you signed up to this study?
2. How have you found self-testing so far?  
Prompts: What has been most difficult in relation to doing the tests?
3. Is there anything which would making the experience easier for you?
4. What is the main reason for you for continuing in the study?
5. What are the benefits for you in taking part in this study, if any?  
Prompts: Are there benefits for you/your family/your friends?

#### Trust in test results

##### [For those who have not tested positive]

1. How accurate do you think your test results have been?  
Prompts: Have you had any reason to question your test result?
2. Have you had any other COVID test during the time you have been in the study?  
If yes: How did you access this test? Why did you have this test carried out?

#### Intentions to act on positive result

##### [For those participants who have had a positive result]

1. How did you feel about the positive result?

- 1
  - 2
  - 3
  - 4
  - 5
  - 6
  - 7
  - 8
  - 9
  - 10
  - 11
  - 12
  - 13
  - 14
  - 15
  - 16
  - 17
  - 18
  - 19
  - 20
  - 21
  - 22
  - 23
  - 24
  - 25
  - 26
  - 27
  - 28
  - 29
  - 30
  - 31
  - 32
  - 33
  - 34
  - 35
  - 36
  - 37
  - 38
  - 39
  - 40
  - 41
  - 42
  - 43
  - 44
  - 45
  - 46
  - 47
  - 48
  - 49
  - 50
  - 51
  - 52
  - 53
  - 54
  - 55
  - 56
  - 57
  - 58
  - 59
  - 60
2. What happened when you got your positive test?  
Prompts: What did you do next?
  3. Did you have another COVID test?  
Prompts: How did you access this test? When did you have this test?
  4. What were the consequences of you getting a positive result?
  5. How accurate do you think your self-test results have been?

**Follow up:**

1. Is there something that you think we didn't cover that is relevant to what we have discussed?
2. Is there anything else you would like to add?

For peer review only

## Online Questionnaire

### Study Title: The Feasibility and Acceptability of community COVID-19 rapid Testing Strategies (FACTS) study

This survey asks about your views on using tests as part of the FACTS study. This survey takes approximately 5 minutes to complete.

#### Your demographic details

Q1. Please confirm that you are a university:

-student (undergraduate)

-student (postgraduate)

-staff member

Q2. What type of training did you receive? (Face to face training/ Online Training)

Please confirm your email address, by which you received this survey link, so we can link your answers to the demographic information you have already provided in the app.

#### Your symptoms

Since receiving the FACTS training, have you had any of the following symptoms:

a. feeling feverish: (Yes / No)

If yes, when did your symptoms start/end?

b. A new, continuous cough? (New: means a cough that you've not had before, or if you usually have a cough, it's got worse. Continuous: means coughing a lot for more than an hour, or 3 or more coughing episodes in 24 hours) (Yes / No)

If yes, when did your symptoms start/end?

c. Feeling unusually short of breath? (Yes / No)

If yes, when did your symptoms start/end?

d. a loss or change to your sense of smell or taste? (Yes / No)

If yes, when did your symptoms start/end?

e. Feeling usually tired? (Yes / No)

If yes, when did your symptoms start/end?

- 1  
2  
3 f. Feeling so ill that you've stopped doing all of your usual daily activities? Answer unable to do  
4 usual activities if you can't do anything you usually would, such as watch TV, use your  
5 phone, read or get out of bed. (Yes/No)  
6

7 If yes, when did your symptoms start/end?  
8

9 I have had no symptoms since attending the FACTS training (YES/NO).  
10

11 Are you taking any medicines for your symptoms? YES/NO. If yes, please tell us the name of the  
12 medicines [free text]  
13  
14  
15

### 16 **Views on testing**

17  
18 **Please respond to the statements below using the scale provided. Please give only one answer per**  
19 **statement.**  
20

21 Strongly agree (7), Agree (6), Slightly agree (5), Neither agree nor disagree (4), Slightly disagree (3),  
22 Disagree (2), Strongly disagree (1).  
23  
24

25 I have been provided with [give choice of tests being used in study] self-test.  
26

- 27 1. I believe [The test] provides reliable and accurate results  
28 2. I believe it is safe to use [the test].  
29 3. It is important for me to know whether I have COVID-19 or not  
30

31 Are you carrying out the COVID tests yourself? YES/NO  
32

33 If YES, go to 4  
34

35 If NO, go to 8  
36

- 37 4. Self-testing with [the test] is easy to fit into my usual activities  
38 5. Self-testing with [the test] every [X] days is easy for me to remember to do  
39 6. I am confident I can carry out [the test]  
40 7. I am confident I can interpret [the test] results  
41 8. Testing for COVID weekly is beneficial to me  
42 9. If I have weekly COVID tests it is beneficial to people who live with me  
43 10. If I have weekly COVID tests it is beneficial to my friends and family  
44 11. If I have weekly COVID tests it is beneficial to the wider community  
45 12. I intend to self-test again in the next week.  
46 13. I would self-isolate if I received a positive test result from [the test].  
47 14. I would self-isolate if I received a positive test result from a laboratory (e.g. NHS or  
48 university) test.  
49  
50  
51  
52  
53

54 Please enter any additional comments you have about self-testing for COVID in the free text box  
55 below:  
56

57 Thank you for completing this survey.  
58  
59  
60

1  
2  
3 If you have any queries about this survey please contact [insert researcher's name and contact  
4 details].  
5  
6  
7  
8  
9  
10  
11  
12  
13  
14  
15  
16  
17  
18  
19  
20  
21  
22  
23  
24  
25  
26  
27  
28  
29  
30  
31  
32  
33  
34  
35  
36  
37  
38  
39  
40  
41  
42  
43  
44  
45  
46  
47  
48  
49  
50  
51  
52  
53  
54  
55  
56  
57  
58  
59  
60

For peer review only

1  
2  
3  
4  
5  
6  
7  
8  
9  
10  
11  
12  
13  
14  
15  
16  
17  
18  
19  
20  
21  
22  
23  
24  
25  
26  
27  
28  
29  
30  
31  
32  
33  
34  
35  
36  
37  
38  
39  
40  
41  
42  
43  
44  
45  
46  
47  
48  
49  
50  
51  
52  
53  
54  
55  
56  
57  
58  
59  
60

For peer review only

## COREQ (CONsolidated criteria for REporting Qualitative research) Checklist

A checklist of items that should be included in reports of qualitative research. You must report the page number in your manuscript where you consider each of the items listed in this checklist. If you have not included this information, either revise your manuscript accordingly before submitting or note N/A.

| Topic                                          | Item No. | Guide Questions/Description                                                                                                                              | Reported on Page No. |
|------------------------------------------------|----------|----------------------------------------------------------------------------------------------------------------------------------------------------------|----------------------|
| <b>Domain 1: Research team and reflexivity</b> |          |                                                                                                                                                          |                      |
| <i>Personal characteristics</i>                |          |                                                                                                                                                          |                      |
| Interviewer/facilitator                        | 1        | Which author/s conducted the interview or focus group?                                                                                                   |                      |
| Credentials                                    | 2        | What were the researcher's credentials? E.g. PhD, MD                                                                                                     |                      |
| Occupation                                     | 3        | What was their occupation at the time of the study?                                                                                                      |                      |
| Gender                                         | 4        | Was the researcher male or female?                                                                                                                       |                      |
| Experience and training                        | 5        | What experience or training did the researcher have?                                                                                                     |                      |
| <i>Relationship with participants</i>          |          |                                                                                                                                                          |                      |
| Relationship established                       | 6        | Was a relationship established prior to study commencement?                                                                                              |                      |
| Participant knowledge of the interviewer       | 7        | What did the participants know about the researcher? e.g. personal goals, reasons for doing the research                                                 |                      |
| Interviewer characteristics                    | 8        | What characteristics were reported about the interviewer/facilitator? e.g. Bias, assumptions, reasons and interests in the research topic                |                      |
| <b>Domain 2: Study design</b>                  |          |                                                                                                                                                          |                      |
| <i>Theoretical framework</i>                   |          |                                                                                                                                                          |                      |
| Methodological orientation and Theory          | 9        | What methodological orientation was stated to underpin the study? e.g. grounded theory, discourse analysis, ethnography, phenomenology, content analysis |                      |
| <i>Participant selection</i>                   |          |                                                                                                                                                          |                      |
| Sampling                                       | 10       | How were participants selected? e.g. purposive, convenience, consecutive, snowball                                                                       |                      |
| Method of approach                             | 11       | How were participants approached? e.g. face-to-face, telephone, mail, email                                                                              |                      |
| Sample size                                    | 12       | How many participants were in the study?                                                                                                                 |                      |
| Non-participation                              | 13       | How many people refused to participate or dropped out? Reasons?                                                                                          |                      |
| <i>Setting</i>                                 |          |                                                                                                                                                          |                      |
| Setting of data collection                     | 14       | Where was the data collected? e.g. home, clinic, workplace                                                                                               |                      |
| Presence of non-participants                   | 15       | Was anyone else present besides the participants and researchers?                                                                                        |                      |
| Description of sample                          | 16       | What are the important characteristics of the sample? e.g. demographic data, date                                                                        |                      |
| <i>Data collection</i>                         |          |                                                                                                                                                          |                      |
| Interview guide                                | 17       | Were questions, prompts, guides provided by the authors? Was it pilot tested?                                                                            |                      |
| Repeat interviews                              | 18       | Were repeat interviews carried out? If yes, how many?                                                                                                    |                      |
| Audio/visual recording                         | 19       | Did the research use audio or visual recording to collect the data?                                                                                      |                      |
| Field notes                                    | 20       | Were field notes made during and/or after the interview or focus group?                                                                                  |                      |
| Duration                                       | 21       | What was the duration of the interviews or focus group?                                                                                                  |                      |
| Data saturation                                | 22       | Was data saturation discussed?                                                                                                                           |                      |
| Transcripts returned                           | 23       | Were transcripts returned to participants for comment and/or                                                                                             |                      |



| Topic                                  | Item No. | Guide Questions/Description                                                                                                        | Reported on Page No. |
|----------------------------------------|----------|------------------------------------------------------------------------------------------------------------------------------------|----------------------|
|                                        |          | correction?                                                                                                                        |                      |
| <b>Domain 3: analysis and findings</b> |          |                                                                                                                                    |                      |
| <i>Data analysis</i>                   |          |                                                                                                                                    |                      |
| Number of data coders                  | 24       | How many data coders coded the data?                                                                                               |                      |
| Description of the coding tree         | 25       | Did authors provide a description of the coding tree?                                                                              |                      |
| Derivation of themes                   | 26       | Were themes identified in advance or derived from the data?                                                                        |                      |
| Software                               | 27       | What software, if applicable, was used to manage the data?                                                                         |                      |
| Participant checking                   | 28       | Did participants provide feedback on the findings?                                                                                 |                      |
| <i>Reporting</i>                       |          |                                                                                                                                    |                      |
| Quotations presented                   | 29       | Were participant quotations presented to illustrate the themes/findings?<br>Was each quotation identified? e.g. participant number |                      |
| Data and findings consistent           | 30       | Was there consistency between the data presented and the findings?                                                                 |                      |
| Clarity of major themes                | 31       | Were major themes clearly presented in the findings?                                                                               |                      |
| Clarity of minor themes                | 32       | Is there a description of diverse cases or discussion of minor themes?                                                             |                      |

Developed from: Tong A, Sainsbury P, Craig J. Consolidated criteria for reporting qualitative research (COREQ): a 32-item checklist for interviews and focus groups. *International Journal for Quality in Health Care*. 2007. Volume 19, Number 6: pp. 349 – 357

**Once you have completed this checklist, please save a copy and upload it as part of your submission. DO NOT include this checklist as part of the main manuscript document. It must be uploaded as a separate file.**

# BMJ Open

## Perceptions on undertaking regular asymptomatic self-testing for COVID-19 using lateral flow tests: A qualitative study of university students and staff

|                                 |                                                                                                                                                                                                                                                                                                                                                                                                                                                                                                                                                                                                                                                                                                                                                                                                                                                                                                                                                                                                                                                                                                                                                                                                                                                                                                                                                                                                                                                                                                                                                                                                                                                                                                                                                                                                                                                                                                                                                                                                                 |
|---------------------------------|-----------------------------------------------------------------------------------------------------------------------------------------------------------------------------------------------------------------------------------------------------------------------------------------------------------------------------------------------------------------------------------------------------------------------------------------------------------------------------------------------------------------------------------------------------------------------------------------------------------------------------------------------------------------------------------------------------------------------------------------------------------------------------------------------------------------------------------------------------------------------------------------------------------------------------------------------------------------------------------------------------------------------------------------------------------------------------------------------------------------------------------------------------------------------------------------------------------------------------------------------------------------------------------------------------------------------------------------------------------------------------------------------------------------------------------------------------------------------------------------------------------------------------------------------------------------------------------------------------------------------------------------------------------------------------------------------------------------------------------------------------------------------------------------------------------------------------------------------------------------------------------------------------------------------------------------------------------------------------------------------------------------|
| Journal:                        | <i>BMJ Open</i>                                                                                                                                                                                                                                                                                                                                                                                                                                                                                                                                                                                                                                                                                                                                                                                                                                                                                                                                                                                                                                                                                                                                                                                                                                                                                                                                                                                                                                                                                                                                                                                                                                                                                                                                                                                                                                                                                                                                                                                                 |
| Manuscript ID                   | bmjopen-2021-053850.R1                                                                                                                                                                                                                                                                                                                                                                                                                                                                                                                                                                                                                                                                                                                                                                                                                                                                                                                                                                                                                                                                                                                                                                                                                                                                                                                                                                                                                                                                                                                                                                                                                                                                                                                                                                                                                                                                                                                                                                                          |
| Article Type:                   | Original research                                                                                                                                                                                                                                                                                                                                                                                                                                                                                                                                                                                                                                                                                                                                                                                                                                                                                                                                                                                                                                                                                                                                                                                                                                                                                                                                                                                                                                                                                                                                                                                                                                                                                                                                                                                                                                                                                                                                                                                               |
| Date Submitted by the Author:   | 14-Jul-2021                                                                                                                                                                                                                                                                                                                                                                                                                                                                                                                                                                                                                                                                                                                                                                                                                                                                                                                                                                                                                                                                                                                                                                                                                                                                                                                                                                                                                                                                                                                                                                                                                                                                                                                                                                                                                                                                                                                                                                                                     |
| Complete List of Authors:       | <p>Wanat, Marta; University of Oxford, Nuffield Department of Primary Care Health Science</p> <p>Logan, Mary; University of Oxford, Nuffield Department of Primary Care Health Sciences; National Institute for Health Research Oxford Biomedical Research Centre, University of Oxford Hospitals NHS Foundation Trust</p> <p>Hirst, Jennifer; University of Oxford, Nuffield Department of Primary Care Health Science; National Institute for Health Research Oxford Biomedical Research Centre, University of Oxford Hospitals NHS Foundation Trust</p> <p>Vicary, Charles; University of Oxford, Nuffield Department of Primary Care Health Sciences</p> <p>Lee, Joseph; University of Oxford, Nuffield Department of Primary Care Health Sciences</p> <p>Perera, Rafael; University of Oxford, Nuffield Department of Primary Care Health Sciences; National Institute for Health Research Oxford Biomedical Research Centre, , University of Oxford Hospitals NHS Foundation Trust</p> <p>Tracey, Irene; University of Oxford, Merton College</p> <p>Duff, Gordon; University of Oxford, St Hilda's College</p> <p>Tufano, Peter; University of Oxford, Saïd Business School</p> <p>Fanshawe, Thomas; University of Oxford, Nuffield Department of Primary Care Health Sciences</p> <p>Mwandigha, Lazaro; University of Oxford, Nuffield Department of Primary Care Health Sciences</p> <p>Nicholson, Brian; University of Oxford, Nuffield Department of Primary Care Health Sciences</p> <p>Tonkin-Crine, Sarah ; University of Oxford, Nuffield Department of Primary Care Health Sciences; NIHR Health Protection Research Unit in Healthcare Associated Infections and Antimicrobial Resistance, University of Oxford in Partnership with Public Health England</p> <p>Hobbs, Richard; University of Oxford, Nuffield Department of Primary Care Health Science; National Institute for Health Research Oxford Biomedical Research Centre, , University of Oxford Hospitals NHS Foundation Trust</p> |
| <b>Primary Subject Heading</b>: | Public health                                                                                                                                                                                                                                                                                                                                                                                                                                                                                                                                                                                                                                                                                                                                                                                                                                                                                                                                                                                                                                                                                                                                                                                                                                                                                                                                                                                                                                                                                                                                                                                                                                                                                                                                                                                                                                                                                                                                                                                                   |

1  
2  
3  
4  
5  
6  
7  
8  
9  
10  
11  
12  
13  
14  
15  
16  
17  
18  
19  
20  
21  
22  
23  
24  
25  
26  
27  
28  
29  
30  
31  
32  
33  
34  
35  
36  
37  
38  
39  
40  
41  
42  
43  
44  
45  
46  
47  
48  
49  
50  
51  
52  
53  
54  
55  
56  
57  
58  
59  
60

|                            |                                                                                                                             |
|----------------------------|-----------------------------------------------------------------------------------------------------------------------------|
| Secondary Subject Heading: | Public health, Health policy, Qualitative research                                                                          |
| Keywords:                  | COVID-19, Public health < INFECTIOUS DISEASES, QUALITATIVE RESEARCH, Infection control < INFECTIOUS DISEASES, PUBLIC HEALTH |
|                            |                                                                                                                             |

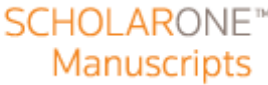



I, the Submitting Author has the right to grant and does grant on behalf of all authors of the Work (as defined in the below author licence), an exclusive licence and/or a non-exclusive licence for contributions from authors who are: i) UK Crown employees; ii) where BMJ has agreed a CC-BY licence shall apply, and/or iii) in accordance with the terms applicable for US Federal Government officers or employees acting as part of their official duties; on a worldwide, perpetual, irrevocable, royalty-free basis to BMJ Publishing Group Ltd ("BMJ") its licensees and where the relevant Journal is co-owned by BMJ to the co-owners of the Journal, to publish the Work in this journal and any other BMJ products and to exploit all rights, as set out in our [licence](#).

The Submitting Author accepts and understands that any supply made under these terms is made by BMJ to the Submitting Author unless you are acting as an employee on behalf of your employer or a postgraduate student of an affiliated institution which is paying any applicable article publishing charge ("APC") for Open Access articles. Where the Submitting Author wishes to make the Work available on an Open Access basis (and intends to pay the relevant APC), the terms of reuse of such Open Access shall be governed by a Creative Commons licence – details of these licences and which [Creative Commons](#) licence will apply to this Work are set out in our licence referred to above.

Other than as permitted in any relevant BMJ Author's Self Archiving Policies, I confirm this Work has not been accepted for publication elsewhere, is not being considered for publication elsewhere and does not duplicate material already published. I confirm all authors consent to publication of this Work and authorise the granting of this licence.

1  
2  
3 1 **Title: Perceptions on undertaking regular asymptomatic self-testing for COVID-19 using lateral flow**  
4 **tests: A qualitative study of university students and staff**  
5 2

6  
7 3 **Authors:** Marta Wanat<sup>1</sup>, Mary Logan<sup>1,2</sup>, Jennifer A. Hirst<sup>1,2</sup>, Charles Vicary<sup>1</sup>, Joseph Jonathan Lee<sup>1</sup>,  
8 Rafael Perera<sup>1,2</sup>, Irene Tracey<sup>3</sup>, Gordon Duff<sup>4</sup>, Peter Tufano<sup>5</sup>, Thomas R. Fanshawe<sup>1</sup>, Lazaro  
9 Mwandigha<sup>1</sup>, Brian D. Nicholson<sup>1</sup>, Sarah Tonkin-Crine<sup>1,6\*</sup>, FD Richard Hobbs<sup>\*1,2</sup>.  
10  
11

12  
13 6 \*Joint senior authors  
14  
15 7

16  
17  
18 8 <sup>1</sup>Nuffield Department of Primary Care Health Science, University of Oxford, Radcliffe Observatory  
19 Quarter, Woodstock Road, Oxford, OX2 6GG

20  
21 10 <sup>2</sup> National Institute for Health Research (NIHR) Oxford Biomedical Research Centre, University of  
22 Oxford Hospitals NHS Foundation Trust, Oxford, UK.

23  
24 12 <sup>3</sup>Merton College, University of Oxford, Merton Street, Oxford, OX1 4JD

25  
26 13 <sup>4</sup>St Hilda's College, University of Oxford, Cowley Place, Oxford, OX4 1DY

27  
28 14 <sup>5</sup>Saïd Business School, University of Oxford, Park End Street, Oxford OX1 1HP

29  
30 15 <sup>6</sup>NIHR Health Protection Research Unit in Healthcare Associated Infections and Antimicrobial  
31 Resistance, University of Oxford in Partnership with Public Health England, Oxford, UK  
32  
33

34  
35 18 Corresponding author pre-publication: Marta Wanat, Nuffield Department of Primary Care Health  
36 Science, University of Oxford, Radcliffe Observatory Quarter, Woodstock Road, Oxford, OX2 6GG,  
37 email: [marta.wanat@phc.ox.ac.uk](mailto:marta.wanat@phc.ox.ac.uk); Tel: +4401865617935  
38

39  
40 21 Corresponding author post-publication: FD Richard Hobbs, Nuffield Department of Primary Care  
41 Health Science, University of Oxford, Radcliffe Observatory Quarter, Woodstock Road, Oxford, OX2  
42 6GG, [richard.hobbs@phc.ox.ac.uk](mailto:richard.hobbs@phc.ox.ac.uk)  
43  
44

45 25 Key words: qualitative; testing; POCT; COVID-19  
46  
47 26  
48  
49 27  
50  
51 28  
52  
53 29  
54  
55 30  
56  
57 31  
58  
59  
60

1  
2  
3 32 **Abstract**  
4

5 33 **Objectives:** Successful implementation of asymptomatic testing programmes using Lateral Flow Tests  
6 (LFTs) depends on several factors, including feasibility, acceptability and how people act on test  
7 34 results. We aimed to examine experiences of university students and staff of regular asymptomatic  
8 35 self-testing using LFTs, and their subsequent behaviours.  
9 36

10  
11  
12  
13 37 **Design and setting:** A qualitative study using semi-structured remote interviews and qualitative survey  
14 38 responses, which were analysed thematically.

15  
16  
17 39 **Participants:** People who were participating in weekly testing feasibility study, between October 2020  
18 40 and January 2021, at the University of Oxford.

19  
20  
21 41 **Results:** We interviewed 18 and surveyed 214 participants. Participants were motivated to regularly  
22 42 self-test as they wanted to know whether or not they were infected with SARS-CoV-2. Most reported  
23 43 that a negative test result did not change their behaviour but it did provide them with reassurance to  
24 44 engage with permitted activities. In contrast, some participants reported making decisions about  
25 45 visiting other people because they felt reassured by a negative test result. Participants valued the  
26 46 training but some still doubted their ability to carry out the test. Participants were concerned about  
27 47 safety of attending test sites with lots of people and reported home testing was most convenient.

28  
29  
30  
31 48 **Conclusions:** Clear messages highlighting the benefits of regular testing for family, friends and society  
32 49 in identifying asymptomatic cases are needed. This should be coupled with transparent  
33 50 communication about accuracy of LFTs and how to act on either a positive or negative result. Concerns  
34 51 about safety, convenience of testing, and ability to do tests need to be addressed to ensure successful  
35 52 scaling up asymptomatic testing.  
36  
37  
38  
39  
40  
41  
42  
43  
44  
45  
46  
47  
48  
49  
50  
51  
52  
53  
54  
55  
56  
57  
58  
59  
60

**Strengths and limitations**

- A unique study exploring people's experiences of regular, weekly asymptomatic self-testing including views and understanding of the accuracy of LFTs, highlighting a number of barriers and facilitators to successful scaling up of asymptomatic testing.
- The mean number of tests conducted by each interview and survey participant was higher than the mean number of tests in non-interviewed participants (i.e. the main study participants), so our sample may over-represent those who continued to test regularly.
- Data represented the views of staff and university students who agreed to take part and their motivation to participate and perceived benefits of testing may be different from those in the wider university population, and other non-university settings.
- The study did not capture the views of participants who had not completed any tests, which should be explored in future studies.
- The study had relatively low response rate for both interviews and surveys, thus may not have captured the views of all participants (e.g. those who disengaged with the study and subsequently, testing).

57

58

59

60

61

62

63

64

65

66

67

68

69

**70 Introduction**

71 In January 2020 the World Health Organisation has declared COVID-19 to be a global health care  
72 emergency,<sup>1</sup> and by June 2021 the number of cases globally now exceeded 177 million.<sup>2</sup> In response  
73 to this crisis, countries across the world have implemented numerous strategies to tackle the  
74 pandemic, including various grades of restriction in population movement, social distancing, use of  
75 face coverings in public, and testing for patients with typical symptoms using laboratory COVID-19  
76 polymerase chain reaction (PCR) tests. While these tests are considered the gold standard for  
77 diagnosis, they have limitations, including slow turn-around time, specialist facilities needed for  
78 processing, and detection of non-infectious SARS-CoV-2 particles, limited access, and high costs.<sup>3</sup>

79 Some individuals infected with SARS-CoV-2 remain asymptomatic, and in symptomatic cases viral  
80 shedding is likely to occur before symptoms occur.<sup>4</sup> Consequently, recent data showing that 1 in 3  
81 people infected with SARS-CoV-2 may not show symptoms, prompted an increased interest from  
82 governments in the feasibility of testing asymptomatic individuals using lateral flow tests (LFTs).<sup>5</sup> In  
83 fact, in a number of countries,<sup>6, 7</sup> including the UK,<sup>8</sup> these devices have been part of government  
84 strategies for easing of lockdowns.

85 LFTs were brought to market for the rapid detection of SARS-CoV-2 antigen in late 2020.<sup>9</sup> LFTs do not  
86 require specialist laboratory equipment and can be performed in the community with results returned  
87 within 30 minutes. In October 2020, the UK government launched a mass-testing initiative using LFTs  
88 across the UK.<sup>10</sup> However, the diagnostic performance of one-off LFTs<sup>11</sup> does not meet the WHO  
89 accepted minimum of 97% specificity and 80% sensitivity, and there is still limited evidence related to  
90 diagnostic performance when used by individuals without symptoms.<sup>12</sup> In order to deliver a successful  
91 testing programme, it was proposed that testing needs a 90% or higher uptake followed by isolation  
92 of infected individuals,<sup>13, 14</sup> coupled with re-testing every few days to improve the diagnostic  
93 performance of the overall testing strategy.<sup>15</sup> In the UK, the LFTs are authorised for use in detecting  
94 positive cases of asymptomatic individuals and are now used in schools and before larger events. The  
95 public can also order two cost-free tests per week for general use.<sup>16</sup>

96 Asymptomatic testing (screening) has attracted a lot of attention, with many highlighting that LFTs  
97 can give people false reassurance,<sup>17</sup> and others stressing that targeted testing could help reduce  
98 transmission.<sup>18, 19</sup> As there are no clinical trials of SARS-CoV-2 screening, there is uncertainty of the  
99 effect. The supposition is that testing frequently may identify asymptomatic cases willing to self-  
100 isolate, which could reduce transmission of infections more than any increase in transmission that



1  
2  
3 101 arises from falsely reassuring people with false negative results. For any given test, people's  
4 102 behaviours related to use of tests and behaviours following the test will determine this balance.  
5 103 Screening pilots usually request that participants do not change their behaviour as a result of being  
6 104 tested and receiving a negative result. The evidence from point-of-care tests for other conditions is  
7 105 that tests are part of complex interventions that change behaviours in unpredictable ways.<sup>20</sup> Evidence  
8 106 is therefore needed on end user perceptions on the use of COVID-19 LFTs.

9  
10  
11  
12  
13  
14 107 Few studies have examined acceptability and feasibility of asymptomatic testing in the community<sup>21</sup>  
15 108 using PCR tests<sup>22, 23</sup> and even fewer have focused on these issues in relation to regular testing (rather  
16 109 than one-off)<sup>23</sup> and LFTs. People's views and understanding of the accuracy of such tests have also  
17 110 not been explored. Our study aimed to address this gap by examining experiences of university  
18 111 students and staff of weekly self-testing using LFTs with the aim of identifying key lessons for future  
19 112 asymptomatic testing programmes.

## 20 113 **Methods**

21 114 Study design: a qualitative study embedded within a mixed methods cohort study.

### 22 115 Study recruitment

23 116 The 'Feasibility and Acceptability of community COVID-19 Testing Strategies' (FACTS) study was a  
24 117 mixed methods cohort study conducted at the University of Oxford. The recruitment began in two  
25 118 sites on 29th October and one site on 17th November 2020 (sites A, B and C). In late November,  
26 119 recruitment was extended across the University, but stopped in early December when a University-  
27 120 wide COVID screening programme was implemented leaving only sites A, B and C continuing with the  
28 121 study. Invitations to participate were sent by email, first only to students and later to staff, to take  
29 122 part in once a week testing. The email invitation also contained a five-minute video explaining how to  
30 123 prepare to test, perform the swab, extract the sample, test the sample and read the results. Eligible  
31 124 participants were asked to complete an e-consent process on the 'CVm-Health+ Education' app on  
32 125 their phones, which was developed by Sensyne Health PLC (Oxford, UK). Those who wanted further  
33 126 information had the opportunity to ask research team members questions at the training session and  
34 127 then consent via the app if they were happy to participate.

### 35 128 Sampling

36 129 Eligibility criteria for the main study included: aged > 16 years old, working or studying across the  
37 130 chosen sites at the University, showing no COVID-19 symptoms (new continuous cough; and/or high  
38 131 temperature; and/or loss of/change to, sense of smell/taste) and being capable of LFT self-  
39 132 administration following training.

### 133 Training

134 The email invitation also contained a five-minute video explaining how to prepare to test, perform the  
135 swab, extract the sample, test the sample and read the results. Participants were invited to a training  
136 session, conducted face-to-face or online, before undertaking weekly testing. Face-to-face training  
137 was carried out at participants' work or place of study. Participants were talked through the aims of  
138 the study, followed by a demonstration of the swabbing, sample preparation, testing, and recording  
139 and interpreting of the test result. Following the demonstration, participants performed the test, with  
140 support from the trainers if required. When 30 minutes had elapsed since applying the sample to the  
141 test device, participants were asked to interpret the result, record this on the app, and photograph  
142 the result using the app. The trainers visually checked each test result and confirmed whether the  
143 participant's interpretation of the result was correct or not. For a small number of participants, live  
144 on-line training was offered. These participants collected test kits in advance from a central location.  
145 This online training was delivered by two trainers via Zoom and involved similar procedures to the  
146 face-to-face training. The session was interactive so participants could ask questions. Everyone had  
147 also been provided with PDF step-by-step illustrated guide to testing.

148 The Participant Information Sheet (PIS) informed participants that rapid tests are not as reliable as, or  
149 a replacement for, a PCR test. In the event of a positive test result, participants were advised to self-  
150 isolate and book a PCR test through the University COVID-19 testing service; in the event of a negative  
151 test, participants were advised to follow normal infection prevention procedures. This information  
152 was repeated during the training where participants were also told that there is limited evidence on  
153 the accuracy of the test in asymptomatic people. At the time of the study the Innova test had not  
154 received MHRA authorisation for asymptomatic testing, nor for self-testing, and the test was used  
155 under research ethics.

### 156 Testing processes

157 While the original plan was to provide all participants with the testing kits to take home after training,  
158 this was not possible in the initial stages of the study. This meant that the repeat weekly testing took  
159 place at the test sites until late November. This involved participants attending at a testing station at  
160 their college or department. Thereafter, participants recruited to the three main sites (Sites A, B and  
161 C) were supplied with sufficient test kits to continue testing in their accommodation or home  
162 throughout the Christmas break until 18th January 2021 (the study end date). Follow-up did not take  
163 place at the other recruiting sites. If participants missed administering a test, they were still eligible to  
164 remain in the study and resume testing on a weekly basis. If a participant received a COVID-19 positive

1  
2  
3 165 result from a PCR test, they were asked to stop self-testing. Participants could withdraw from the  
4  
5 166 study by contacting the study team, without providing a reason.  
6  
7

8 167 All participants used the same test, the Innova Rapid SARS-CoV-2 Antigen Test Kit (Innova Medical  
9  
10 168 Group, US) developed for testing symptomatic individuals. The manufacturers report it can detect the  
11 169 SARS-CoV-2 antigens within 20 minutes and a negative test result within 30 minutes.<sup>24, 25</sup> The  
12  
13 170 instructions for use require nasal and tonsil swabbing, transfer of the sample to an extraction buffer  
14  
15 171 solution, then application of the mixture to the device.<sup>26</sup>  
16  
17

172

18 173 Interview recruitment and data collection  
19

20  
21 174 Eligibility criteria for the interview study included: aged > 16 years old, working or studying across the  
22  
23 175 chosen sites at the University. A selection of participants who agreed to be contacted about an  
24  
25 176 interview at the study enrolment stage, were invited via email. We used purposive sampling, in order  
26  
27 177 to obtain variation in university role (student or staff) and department, aiming to obtain equal number  
28  
29 178 of staff and student participants. A semi-structured interview guide was developed based on the  
30  
31 179 primary research questions (Appendix 1). Participants were asked about their views and experiences  
32  
33 180 of using the tests, their reasons for taking part in the study, barriers and facilitators to undertaking  
34  
35 181 regular testing, trust in test results and intentions to act on a positive result. After explaining the  
36  
37 182 purpose of the interview, participants were asked to give oral consent, which was in addition to the  
38  
39 183 main study consent. Following the interview, they were also provided with a written record of their  
40  
41 184 consent. The interviews were conducted by a senior female postdoctoral qualitative researcher (MW)  
42  
43 185 over the telephone or using video conference software, depending on participant preference. The  
44  
45 186 interviewer was not involved in training of participants. The interviews were audio recorded and  
46  
47 187 continued until data indicated saturation.<sup>27</sup> NVivo 12 was used to facilitate data analysis.  
48  
49

50 188 Survey recruitment and data collection  
51

52  
53 189 As part of the wider study, we also conducted a survey examining participants' views of regular testing  
54  
55 190 (Appendix 2). The survey was designed using JISC Online Surveys software which was in line with  
56  
57 191 Information Governance procedures of the University of Oxford. The survey was sent to all  
58  
59 192 participants of the main study via email, asking them to complete it as part of the study. There was no  
60  
193 separate consent form for the survey as it was part of the main study, to which all participants gave  
194  
195 consent via the app. After data collection was completed, the data was deleted from the platform and  
196  
197 stored securely on a University network.

197

198

199 Data analysis

200 Based on the free text comments from the survey, MW and STC created an initial framework consisting  
201 of nine categories that captured key areas of interest. Using this framework, detailed summaries of  
202 interview data, including verbatim quotes, were made directly from the audio recording after each  
203 interview.<sup>28</sup>These were further developed and then used to create themes and sub-themes. This  
204 method is deemed a pragmatic and efficient approach to collect and analyse data rapidly during a  
205 public health emergency.<sup>29</sup>

206 Patient and Public Involvement (PPI)

207 This study was rapidly set up and therefore did not include any PPI input. All participants will receive  
208 a summary of the results.

209

## 210 Results

211 At the three primary recruitment sites (A, B and C), 551 (25%) participated. A further 183 participants  
212 were recruited across other sites, so the total sample size was 734. Between October 2020 and January  
213 2021, they performed 3187 LFTs.

214 Participants completed a mean of 4.3 tests over a mean of 4.8 weeks. Eighty percent (n=588) of  
215 participants were students, with a mean±SD age of 26±8 years, 20% (n=146) were staff, with a  
216 mean±SD age of 42±11 years. Overall, 55% were women and 83% were of white ethnicity. Table 1  
217 describes demographic characteristics of all FACTS study participants per site.

218 431 of 734 (59%) participants indicated on the main study consent form that they would be  
219 interested in taking part in an interview. Fifty-two were approached and 18 participants responded  
220 and all chose to take part (response rate 35%). Of these, 3 were undergraduate students, 3 were  
221 postgraduate students and 12 were staff. Each interview participant had completed between 3 and  
222 10 tests during the whole study period (mean 7.7). Table 2 provides demographic characteristics of  
223 interview participants. The interviews took place between 11<sup>th</sup> December 2020 and 18<sup>th</sup> January  
224 2021 and lasted between 17 and 43 minutes (mean 26 minutes). In addition, 214 participants  
225 completed the survey (29%); 62 provided additional free text comments. Each survey participant  
226 completed between 1 and 13 tests (mean=5.8). Table 3 provides demographic characteristics of  
227 survey participants.

228 We identified four themes in relation to participants' views and experiences on SARS-CoV-2 self-  
229 testing with LFT, which we report below with supporting quotes.

### 230 **Theme 1: Perceived benefits to regular testing**

231 Participants reported three main benefits of taking part in the study and having access to regular  
232 self-testing. Firstly, they wanted to check regularly whether or not they were infected with SARS-  
233 CoV-2, to reduce their fear of unknowingly infecting others, which was a concern they mentioned  
234 frequently. In addition, participants wanted to know if they were infected so they could take  
235 appropriate action, i.e. self-isolate and thus minimise the risk of spreading the virus.

236 Secondly, some students highlighted that deciding to self-test with a LFT was perceived as a personal  
237 choice and therefore more acceptable than undertaking National Health Service (NHS) or university  
238 testing when experiencing symptoms. The university protocol for symptomatic testing required  
239 everyone in the household to enter into isolation at the time of getting a test rather than at the time  
240 of getting a positive result. As participants explained, peer pressure may prevent people from doing  
241 NHS or university testing.

242 *Getting an NHS test is such an ordeal and in a university context, there is pressure not to*  
243 *get tested because getting that test puts your whole house into a lockdown. This test*  
244 *removes barriers [...] You do it as a personal choice and not something where you get*  
245 *permission from the whole household to get tested [P2, Student, Interview]*

246 Finally, all interviewees wanted to support COVID-19 research to contribute to fighting the  
247 pandemic.

### 249 **Theme 2: Perceptions of test accuracy and its implications**

250 Overall, participants mostly accepted that tests were not 100% accurate. This was related to the fact  
251 that they saw them as just one of the measures to try to avoid spreading the virus (among social  
252 distancing, face masks and future vaccines). Some participants lacked any recalled information on  
253 test accuracy, while others sought their own information on the accuracy of LFTs in general or had  
254 heard information from family and friends. The perceived accuracy varied greatly, with participants  
255 citing figures between 50 and 90%. It is important to highlight that often the same figure was seen as  
256 reassuring by some participants and not by others.

1  
2  
3 257 *I am sceptical because someone who works in the industry told me that some hospital*  
4 *stopped using the tests because with poor training it has an effectiveness rate of 50% [P19,*  
5 258 *Student, Interview]*  
6 259

8  
9 260 *I talked to a friend who is a nurse; and she said that they are around 60% which is a decent*  
10 261 *percentage to be accurate [P18, Staff, Interview]*

12  
13 262 Participants' views on test accuracy were important when making decisions about their behaviour.  
14 263 Participants did not view a negative test result as permission to break government guidelines, but  
15 264 reported that negative tests increased their confidence to engage with activities that were allowed.

18  
19 265 *I am not sure [the test result] changed our behaviour but it reassured us that I am going to*  
20 266 *have two tests during that time and if they are both negative that gives you a bit of*  
21 267 *reassurance that this is a reasonable thing to do [P11, Staff, Interview]*

23  
24 268 Crucially, some participants did make decisions, based on negative test results, about engaging with  
25 269 activities where there was potential for transmission (for example seeing a relative or extent of  
26 270 contact with relatives at home) because they were unaware that tests were not 100% accurate.  
27 271 When later learning that tests were not 100% accurate, participants were concerned about their  
28 272 decisions.

31  
32  
33 273 *I have read online about the reliability of the tests and initially that gave me a lot of*  
34 274 *confidence. [...] and when I had a negative test I felt that I could go and have a cup of tea*  
35 275 *with a relative and then I read that the reliability was [...] so some of the figures were down*  
36 276 *in the 50s or 60s, so 60% and then you thought 'oh this is not that reassuring [P14, Staff,*  
37 277 *Interview]*

39  
40 278 *I have done all these tests which were negative and after the 3rd test I was less careful for*  
41 279 *sure [P5, Student, Interview]*

42  
43 280 Finally, some participants were unsure whether the information they had read about LFTs was  
44 281 relevant to the test they had been using. They highlighted the difficulty of making a decision on  
45 282 whether to engage with certain (allowed) activities or not.

46  
47 283 *I read in the newspapers that when done by trained medical staff the tests are only 75%*  
48 284 *accurate, and by non-medical staff 50%. [...] So if I have 50-50 success rate is that a good*  
49 285 *thing or is it better not to know [P3, Staff, Interview]*

50  
51  
52 286 **Theme 3: Extent of confidence in ability to do the tests**

1  
2  
3 287 The majority of participants felt that the training they had received enabled them to feel confident  
4  
5 288 about doing the tests. While doing tests repeatedly increased participants' confidence, a number of  
6  
7 289 participants were still unsure whether they were doing the test correctly, especially the tonsil swab.  
8  
9 290 Some questioned whether an incorrect swab would make the test less reliable.

10  
11 291 *I have very strong gag reflex so I am unable to reach my tonsils.[...] I have not been able to*  
12  
13 292 *get an answer on whether it is important to swab the tonsils [P8, Staff, Interview]*

14  
15 293 Participants felt that doing the tests at home was easier as they had access to mirrors; in contrast,  
16  
17 294 they highlighted having to rely on their phone cameras to do the test on site. When doing tests at  
18  
19 295 home, having a card which summarised the instructions was also suggested, as instead participants  
20  
21 296 had to re-watch the video every time they were unsure about some aspect of the self-testing. In  
22  
23 297 contrast, doing tests on site was perceived as helpful by some participants as they could ask other  
24  
25 298 participants for tips. Seeing other people experience physical sensations such as watering eyes or  
26  
27 299 gagging, was helpful in knowing what to expect and provide reassurance that they "were doing it  
30  
31 300 right".

32  
33 301

#### 34 302 **Theme 4: Barriers and facilitators to regular testing**

35  
36 303 All interviewees experienced swabbing as uncomfortable, at least to a certain extent, with some  
37  
38 304 reporting having a strong gag reflex and testing causing sneezing or watering eyes. However, most  
39  
40 305 participants highlighted that these sensations were temporary, manageable and were a "small price  
41  
42 306 to pay" for getting reassurance on whether they were infected (as described in theme 1).

43  
44 307 Participants who were able to take a number of testing kits home seemed to see testing as relatively  
45  
46 308 easy to fit tests into their weekly routine. In contrast, for participants who did not get packs to take  
47  
48 309 home and who had to go to their department to self-test, it was an inconvenience and caused  
49  
50 310 frustration, especially as testing took place over several weeks. This was especially the case for staff.

51  
52 311 While training in a group was perceived as beneficial (as described in theme 2), some participants  
53  
54 312 were also concerned about the safety of getting tested on site, related to being around other  
55  
56 313 people, especially if they had not been going out much.

57  
58 314 *It was quite frustrating that we were expected to conduct the test in person in a lecture hall*  
59  
60 315 *with many other students for the first few weeks, as this was the biggest personal risk I took*  
*in terms of COVID-19 exposure [P10, Student, Survey].*

1  
2  
3 317 *Going to the college [...] makes me a bit worried about exposure to COVID while testing,*  
4 *despite social distancing measures [P17, Student, Survey]*  
5 318

6  
7 319 Finally, participants stated that they aimed to carry out testing on a weekly basis but wanted a  
8  
9 320 reminder to do so when the test was due each week, and some felt this could provide additional  
10 321 encouragement.

## 11 322 **Discussion**

12  
13 323 We found that interviewees were motivated to conduct once weekly testing as they wanted to know  
14  
15 324 whether or not they were infected with SARS-CoV-2. While most participants accepted that the test  
16  
17 325 was not 100% accurate, many could not quantify this further and estimates of test accuracy varied  
18  
19 326 greatly among participants. Importantly, most reported that a negative test result did not change their  
20  
21 327 behaviour but some participants reported making decisions about contact with other people when  
22  
23 328 they would not have done otherwise, because they felt reassured by a negative test result.  
24  
25 329 Participants valued the training but some individuals still doubted their ability to do the test.  
26  
27 330 Participants also raised the importance of safety and convenience when attending for tests on site.

## 28 331 *Comparison with existing literature*

29  
30  
31 332 Participants in our study wanted to have once weekly testing to reduce their fear of accidentally  
32  
33 333 infecting their family, friends or other people in their community, while also wanting to contribute to  
34  
35 334 fighting the pandemic. This is in line with the Liverpool COVID-SMART study, which found that people  
36  
37 335 signed up to have a test as they wanted to protect their families, friends as well as local hospitals and  
38  
39 336 NHS workers.<sup>21</sup> Only one study in a university setting explored these issues, albeit involving PCR tests,  
40  
41 337 and also reported similar reasons.<sup>22</sup> Our study also highlights the importance of the perceived benefits  
42  
43 338 but in the context of regular once weekly rather than one-off testing and use of LFTs. It also suggests  
44  
45 339 that asymptomatic testing using LFTs may be perceived as more accessible and acceptable for  
46  
47 340 students, in comparison to NHS or University testing, which has not been identified before.

48  
49 341 Importantly, our study found that while most participants understood that the test was “not 100%  
50  
51 342 accurate”, estimates of test accuracy varied greatly among participants. Most reported that negative  
52  
53 343 test results did not change their behaviour but it did provide them with reassurance to engage with  
54  
55 344 permitted activities. However, some participants felt reassured by the test and reported making  
56  
57 345 decisions involving contact with other people, when they would not have done otherwise. Previous  
58  
59 346 studies have only explored these issues for antibody testing.<sup>30</sup> The Liverpool COVID-SMART study  
60  
347 indicated that some participants had concerns about test accuracy<sup>21</sup> and one study in a university  
348 setting found that 79.6% of participants were confident in the outcome of their PCR test.<sup>31</sup>



1  
2  
3 349 Finally, while our participants described swabbing as being uncomfortable, they felt that the perceived  
4  
5 350 benefits outweighed the burden of doing the tests. Having access to a number of tests which they  
6  
7 351 could do at home made it easier for participants to take part, while doing the testing on site provided  
8  
9 352 an opportunity for feedback on how well participants were doing the test but magnified safety  
10  
11 353 concerns. Misinformation related to perception of the risk of infection at test sites, and the need to  
12  
13 354 have physical contact with centre staff, have been described before.<sup>31</sup>

### 14 355 *Strengths and limitations*

15  
16 356 This first qualitative study examining views and experiences of students and staff of regular  
17  
18 357 asymptomatic SARS-CoV-2 testing in a university setting using LFTs highlights a number of key issues  
19  
20 358 related to acceptability and feasibility of regular testing as well as its behavioural implications. We  
21  
22 359 note some limitations. Firstly, the mean number of tests conducted by each interview and survey  
23  
24 360 participant was higher than the mean number of tests in non-interviewed participants (i.e. the main  
25  
26 361 study participants), so our sample may over-represent those who continued to test regularly. In fact,  
27  
28 362 we have not captured the views of those participants who had not completed any testing during the  
29  
30 363 study period. Future studies should include the perspectives of participants who did not use the test  
31  
32 364 even when provided with the opportunity and resources to do so, in order to understand the  
33  
34 365 barriers to uptake and regular testing. Secondly, the FACTS participants were university student and  
35  
36 366 staff volunteers, whose motivation to participate and perceived benefits may be different from  
37  
38 367 those in the wider university population, and other non-university settings. Thirdly, while the aim  
39  
40 368 was to recruit equal numbers of students and staff for interviews, we interviewed more staff. This  
41  
42 369 was in line with the main study where we found a higher follow-up rate in staff than in students,  
43  
44 370 suggesting that staff were more likely to be compliant to testing and remained in the study for a  
45  
46 371 higher proportion of their potential follow-up time than students. Finally, the response rate of the  
47  
48 372 interview and survey was relatively low, which may have meant that views of some participants have  
49  
50 373 not been captured (for example, those disengaged with the programme). This may be explained by  
51  
52 374 the timing of both the survey and interview study; recruitment took place very close to the  
53  
54 375 Christmas break thus possibly limiting opportunities for staff and student to commit time to these  
55  
56 376 aspects of the programme.

### 57 377 *Implications for policy and practice and future research*

58  
59 378 Our study indicates that messages highlighting the benefits for family, friends and society in  
60  
61 379 identifying asymptomatic cases, contributing to fighting the pandemic and ultimately lifting  
62  
63 380 lockdowns might be beneficial for encouraging regular use of LFTs. However, these need to be  
64  
65 381 coupled with clear and transparent communication about LFT accuracy. Also, given that the same

1  
2  
3 382 reported accuracy of the test might be perceived by different people as more or less favourable, it is  
4  
5 383 crucial that this is framed within clear messages on what it means for an individual's behaviour (i.e.  
6  
7 384 the need to follow COVID-19 safety measures). This is especially important for testing in workplaces  
8  
9 385 or schools where a negative test may allow people to return to their study or workplace and will  
10  
11 386 consequently involve contact with other people. Advice that supports people to continue physical  
12  
13 387 distancing, hand hygiene and mask wearing in the context of a negative test is crucial. A recent  
14  
15 388 report of implementation of asymptomatic testing in local authorities in England showed that 47% of  
16  
17 389 local authority websites did not explain the limitations of LFTs<sup>17</sup> or that people should continue  
18  
19 390 following safety measures despite a negative result and highlighted a lack of standard messaging on  
20  
21 391 test accuracy.<sup>17</sup>

22  
23 392 When scaling up regular asymptomatic testing, it is important to also consider potential concerns  
24  
25 393 about convenience of testing, and people's confidence and ability to do the testing. In settings  
26  
27 394 where people may be tested on site, safety and convenience may be important to consider.  
28  
29 395 Concerns about physical sensations also need to be addressed. Whereas, for those who are sent  
30  
31 396 tests to take at home, clear information on testing procedures and a reminder to take the test will  
32  
33 397 be of importance.

### 31 398 **Conclusions**

34 399 Clear messages highlighting the benefits of regular testing for family, friends and society in  
35  
36 400 identifying asymptomatic cases are needed. This should be coupled with transparent communication  
37  
38 401 about accuracy of LFTs and how to act on either a positive or negative result. Concerns about safety,  
39  
40 402 convenience of testing, and ability to do tests need to be addressed to ensure successful scaling up  
41  
42 403 asymptomatic testing.

43 404 **Acknowledgments:** The authors are grateful to the participants who took part in the study.

45 405 **Contributors:** MW designed the study, undertook data collection and analysis, and co-wrote the  
46  
47 406 manuscript. ML designed the study and critically appraised the manuscript. JAH designed the study,  
48  
49 407 contributed to the analysis and critically appraised the manuscript. CV, JAH, RP, IT, GD, JIL and PT  
50  
51 408 designed the study and critically appraised the manuscript. TRF and LM designed the study,  
52  
53 409 contributed to the analysis and critically appraised the manuscript. BDN designed the study and  
54  
55 410 critically appraised the manuscript. STC designed the study, contributed to data analysis and co-  
56  
57 411 wrote the manuscript. FDRH obtained the funding, designed the study and critically appraised the  
58  
59 412 manuscript.  
60

413 **Funding statement:** This study has received an internal funding from the University of Oxford (no  
414 grant number).

415 MW and STC received funding from the EU Horizon 2020 Research and Innovation. STC also received  
416 funding from the National Institute for Health Research Health Protection Research Unit (NIHR HPRU)  
417 in Healthcare Associated Infections and Antimicrobial Resistance at the University of Oxford in  
418 partnership with Public Health England (PHE). ML and JH are funded by the NIHR Biomedical Research  
419 Centre, Oxford. TF and LM receive funding from the National Institute for Health Research (NIHR)  
420 Community Healthcare MedTech and In Vitro Diagnostics Co-operative at Oxford Health NHS  
421 Foundation Trust. TF receives funding from the National Institute for Health Research (NIHR) Applied  
422 Research Collaboration Oxford and Thames Valley at Oxford Health NHS Foundation Trust. The views  
423 expressed are those of the author(s) and not necessarily those of the NHS, the NIHR or the Department  
424 of Health and Social Care. LT also acknowledges part support from the NIHR Biomedical Research  
425 Centre, Oxford. BN is funded by an NIHR Academic Clinical Lectureship. FDRH acknowledges part  
426 support from the NIHR School for Primary Care Research (SPCR), the NIHR Collaboration for Leadership  
427 in Applied Research in Health and Care (CLARHC) Oxford, and the NIHR Biomedical Research Centre,  
428 Oxford (OUHT BRC).

429 **Competing interest:** None declared

430 **Ethics Approval:** The study was approved by the University of Oxford Research Ethics Committee in  
431 October 2020 (CUREC ethics reference R72896/RE001).

432 **Provenance and peer review:** Not commissioned; externally peer reviewed.

433 **Data sharing statement:** No additional data are available.

434 Table 1 Demographic characteristics of participants in the main study

|                               | Overall     | Three main sites    |             |             | Other sites |             |
|-------------------------------|-------------|---------------------|-------------|-------------|-------------|-------------|
|                               |             | Combined main sites | Site A      | Site B      |             | Site C      |
| <b>Participants, N (%)</b>    | 734         | 551 (26%)           | 165 (20%)   | 141 (18%)   | 245 (50%)   | 183         |
| Staff                         | 146         | 115                 | 31          | 23          | 61          | 31          |
| Students                      | 588         | 436                 | 134         | 118         | 184         | 152         |
| <b>Number of tests</b>        | 3187        | 2728                | 1047        | 690         | 991         | 459         |
| <b>Male sex, N (%)</b>        | 327 (45%)   | 244 (44%)           | 64 (39%)    | 56 (40%)    | 124 (51%)   | 83 (45%)    |
| <b>Mean (SD) age</b>          | 28.8 (10.7) | 29.3 (10.7)         | 27.4 (12.0) | 25.4 (10.4) | 32.7 (8.6)  | 27.5 (10.7) |
| <b>White ethnicity, N (%)</b> | 608 (83%)   | 451 (82%)           | 150 (91%)   | 131 (93%)   | 170 (69%)   | 157 (86%)   |

435

436 Table 2 Demographic characteristics of interview participants

|                        | Overall number | Site A      | Site B      | Site C      | Other sites |
|------------------------|----------------|-------------|-------------|-------------|-------------|
| Participants, N        | 18             | 8           | 3           | 4           | 3           |
| Role:                  | 10             | 4           | 3           | 2           | 1           |
| Staff, N               |                |             |             |             |             |
| Students, N            | 8              | 4           | 0           | 2           | 2           |
| Male sex, N (%)        | 11 (61%)       | 4           | 2           | 4           | 1           |
| Mean (SD) age          | 35.1 (14.2)    | 34.6 (17.3) | 45.3 (10.8) | 28.8 (6.80) | 34.3 (15.3) |
| White ethnicity, N (%) | 17 (94%)       | 7 (88%)     | 3 (100%)    | 4 (100%)    | 3 (100%)    |

437 Table 3 Demographic characteristics of survey participants

|                        | Overall number | Site A      | Site B      | Site C      | Other sites |
|------------------------|----------------|-------------|-------------|-------------|-------------|
| Participants, N (%)    | 214            | 64          | 47          | 39          | 64          |
| Role:                  | 72             | 19          | 21          | 16          | 16          |
| Staff, N               |                |             |             |             |             |
| Students, N            | 142            | 45          | 26          | 23          | 48          |
| Male sex, N (%)        | 101 (47%)      | 22          | 31          | 14          | 34          |
| Mean (SD) age          | 31.6 (12.8)    | 29.9 (12.7) | 36.2 (11.8) | 32.3 (14.4) | 29.6 (11.9) |
| White ethnicity, N (%) | 202 (94%)      | 62 (96%)    | 47 (91%)    | 37 (95%)    | 56 (87%)    |

438

439

440 **References**

- 441 1. World Health Organisation. Timeline: WHO's COVID-19 response. 2020. Available from  
442 [Timeline of WHO's response to COVID-19](#)
- 443 2. World Health Organisation. Weekly epidemiological update on COVID-19 - 22 June 2021.  
444 2021. Available from: [Weekly epidemiological update on COVID-19 - 22 June 2021 \(who.int\)](#)
- 445 3. Kashir J, Yaqinuddin A. Loop mediated isothermal amplification (LAMP) assays as a rapid  
446 diagnostic for COVID-19. *Med Hypotheses*. 2020;141:109786.
- 447 4. He X, Lau EH, Wu P, Deng X, Wang J, Hao X, et al. Temporal dynamics in viral shedding and  
448 transmissibility of COVID-19. *Nat Med*. 2020;26(5):672-5.
- 449 5. Department of Health and Social Care. Asymptomatic testing to be rolled out across the  
450 country starting this week. London; 2021. Available from: [Asymptomatic testing to be rolled out  
451 across the country starting this week - GOV.UK \(www.gov.uk\)](#)
- 452 6. European Centre for Disease Prevention and Control. Population-wide testing of SARS-CoV-  
453 2: country experiences and potential approaches in the EU/EEA and the United Kingdom.  
454 Stockholm: ECDC; 2020. Available from: [Population-wide testing of SARS-CoV-2: country experiences  
455 and potential approaches in the EU/EEA and the United Kingdom \(europa.eu\)](#)
- 456 7. Holt E. Slovakia to test all adults for SARS-CoV-2. *Lancet*. 2020;396(10260):1386-7.
- 457 8. Raffle AE, Gill M. Mass screening for asymptomatic SARS-CoV-2 infection. *BMJ*.  
458 2021;373:n1058.
- 459 9. Andryukov BG. Six decades of lateral flow immunoassay: from determining metabolic  
460 markers to diagnosing COVID-19. *AIMS Microbiol*. 2020;6(3):280.

- 1  
2  
3 461 10. Iacobucci G, Coombes R. Covid-19: Government plans to spend £100bn on expanding testing  
4 462 to 10 million a day. *BMJ*. 2020.
- 5 463 11. Rudolf F, Kaltenbach H-M, Linnik J, Ruf M-T, Niederhauser C, Nickel B, et al. Clinical  
6 464 characterisation of eleven lateral flow assays for detection of COVID-19 antibodies in a population.  
7 465 MedRxiv. 2020.
- 9 466 12. World Health Organisation. Target product profiles for priority diagnostics to support  
10 467 response to the COVID-19 pandemic. 2021. Available from: [COVID-19 Target product profiles for  
11 468 priority diagnostics to support response to the COVID-19 pandemic v.1.0 \(who.int\)](https://www.who.int/publications/m/item/target-product-profiles-for-priority-diagnostics-to-support-response-to-the-covid-19-pandemic-v10)
- 12 469 13. UK Government. TFMS: Behavioural paper supporting the consensus statement on mass  
13 470 testing, 27 August 2020 UK Government. 2020. Available from: [TFMS: Behavioural paper supporting  
14 471 the consensus statement on mass testing, 27 August 2020 - GOV.UK \(www.gov.uk\)](https://www.gov.uk/government/publications/behavioural-paper-supporting-the-consensus-statement-on-mass-testing-27-august-2020)
- 15 472 14. UK Government. Multidisciplinary Task and Finish Group on Mass Testing. Consensus  
16 473 Statement for SAGE 2020 08 March 2021. 2021. Available from: [TFMS: Consensus statement on mass  
17 474 testing \(publishing.service.gov.uk\)](https://publishing.service.gov.uk/government/publications/mass-testing-consensus-statement-for-sage-2020-08-march-2021)
- 19 475 15. Torjesen I. Covid-19: How the UK is using lateral flow tests in the pandemic. *BMJ*. 2021;372.  
20 476 16. Mahase E. Covid-19: UK extends lateral flow test authorisation despite US warning not to  
21 477 use them. *BMJ*. 2021;373:n1582.
- 22 478 17. Mahase E. Covid-19: People are not being warned about pitfalls of mass testing. *BMJ*. 2021.  
23 479 18. Kmietowicz Z. Covid-19: Controversial rapid test policy divides doctors and scientists. *BMJ*.  
24 480 2021.
- 25 481 19. Limb M. Covid-19: Use lateral flow tests in schools to find cases, urges Independent SAGE.  
26 482 *BMJ*. 2021.
- 28 483 20. Eley CV, Sharma A, Lecky DM, Lee H, McNulty CAM. Qualitative study to explore the views of  
29 484 general practice staff on the use of point-of-care C reactive protein testing for the management of  
30 485 lower respiratory tract infections in routine general practice in England. *BMJ Open*.  
31 486 2018;8(10):e023925.
- 32 487 21. University of Liverpool. Liverpool COVID-19 Community Testing Pilot. 2020. Available from:  
33 488 [https://www.liverpool.ac.uk/media/livacuk/coronavirus/Liverpool Community Testing Report.pdf](https://www.liverpool.ac.uk/media/livacuk/coronavirus/Liverpool_Community_Testing_Report.pdf)
- 34 489 22. Blake H, Knight H, Jia R, Corner J, Morling JR, Denning C, et al. Students' views towards Sars-  
35 490 Cov-2 mass asymptomatic testing, social distancing and self-isolation in a university setting during  
36 491 the COVID-19 pandemic: A qualitative study. *Int J Env Res Pub He*. 2021;18(8):4182.
- 37 492 23. Gillam TB, Cole J, Gharbi K, Angiolini E, Barker T, Bickerton P, et al. Norwich COVID-19 testing  
38 493 initiative pilot: evaluating the feasibility of asymptomatic testing on a university campus. *J Public  
39 494 Health*. 2021;43(1):82-8.
- 40 495 24. Innova Medical Group. SARS-CoV-2 Antigen Rapid Qualitative Test. Instructions for Use 2020  
41 496 [updated 15 March 2021. Available from:  
42 497 [https://minhalexander.files.wordpress.com/2020/12/instructions-for-use-innova-sars-cov-2-antigen-  
43 498 test-ifu.pdf](https://minhalexander.files.wordpress.com/2020/12/instructions-for-use-innova-sars-cov-2-antigen-test-ifu.pdf).
- 44 499 25. UK Government. TFMS: Behavioural paper supporting the consensus statement on mass  
45 500 testing, 27 August 2020 2020. Available from: [https://www.gov.uk/government/publications/tfms-  
46 501 behavioural-paper-supporting-the-consensus-statement-on-mass-testing-27-august-2020](https://www.gov.uk/government/publications/tfms-behavioural-paper-supporting-the-consensus-statement-on-mass-testing-27-august-2020) .
- 47 502 26. NHS. A guide for healthcare staff self-testing for coronavirus using a Lateral Flow Device  
48 503 (LFD) 2020. Available from: [https://www.england.nhs.uk/coronavirus/wp-  
49 504 content/uploads/sites/52/2020/11/LFD NHSStaff A4 161120 .pdf](https://www.england.nhs.uk/coronavirus/wp-content/uploads/sites/52/2020/11/LFD_NHSStaff_A4_161120.pdf).
- 50 505 27. Fusch PI, Ness LR. Are we there yet? Data saturation in qualitative research. *Qual Rep*.  
51 506 2015;20(9):1408.
- 52 507 28. Vindrola-Padros C, Chisnall G, Cooper S, Dowrick A, Djellouli N, Symmons SM, et al. Carrying  
53 508 Out Rapid Qualitative Research During a Pandemic: Emerging Lessons From COVID-19. *Qual Health  
54 509 Res*. 2020;30(14):2192-204.
- 55 510 29. Johnson GA, Vindrola-Padros CJSS, Medicine. Rapid qualitative research methods during  
56 511 complex health emergencies: a systematic review of the literature. *Soc Sci Med*. 2017;189:63-75.

- 1  
2  
3 512 30. Lecouturier J, Kelly MP, Graham F, Meyer C, Tang MY, Goffe L, et al. Public understanding of  
4 513 COVID-19 antibody testing and test results: A qualitative study conducted in the UK early in the  
5 514 pandemic. *Soc Sci Med*. 2021;273:113778.  
6 515 31. Blake H, Corner J, Cirelli C, Hassard J, Briggs L, Daly JM, et al. Perceptions and experiences of  
7 516 the university of nottingham pilot sars-cov-2 asymptomatic testing service: a mixed-methods study.  
8 517 *Int J Env Res Pub He..* 2021;18(1):188.

10 518

12 519

13  
14  
15  
16  
17  
18  
19  
20  
21  
22  
23  
24  
25  
26  
27  
28  
29  
30  
31  
32  
33  
34  
35  
36  
37  
38  
39  
40  
41  
42  
43  
44  
45  
46  
47  
48  
49  
50  
51  
52  
53  
54  
55  
56  
57  
58  
59  
60

For peer review only

## Appendix

### Appendix 1: Topic Guide

#### Topics to be explored

Below is a list of topics to be discussed in this study. The work will remain flexible with respect to participants' agendas. Therefore, we may add new topics as the interviews progress and data collection continues. However, the key topic of participants' views and experiences using the tests, the perceived benefits of testing, barriers and facilitators to undertaking regular testing, trust in test results and intentions to act on positive result, will remain the same.

1. Participants' views and experiences of using the tests.
2. Participants' views and experiences on barriers and facilitators to undertaking regular testing
3. Participants' views on trust in test results.
4. Participants' views and experiences of perceived benefits of testing
5. Participants' intentions to act on positive result.

#### Using the tests

1. Can you tell me about your experience of self-testing for COVID so far?
2. Can you tell me about the training you had on how to self-test, as part of the FACT study?  
Prompts: What did the training involve? What did you think about the training? Is there anything which would make the training easier for you? How confident did you feel about doing the test?
3. How did you feel about doing the test for the first time?
4. How have you found self-testing over time?  
Prompts: Have you had any difficulties in doing the test? If, so what happened and what did you do? How did you overcome difficulties?

#### Barriers and facilitators to undertaking regular testing; perceived benefits of testing

1. Can you tell me why you signed up to this study?
2. How have you found self-testing so far?  
Prompts: What has been most difficult in relation to doing the tests?
3. Is there anything which would making the experience easier for you?
4. What is the main reason for you for continuing in the study?
5. What are the benefits for you in taking part in this study, if any?  
Prompts: Are there benefits for you/your family/your friends?

#### Trust in test results

##### [For those who have not tested positive]

1. How accurate do you think your test results have been?  
Prompts: Have you had any reason to question your test result?
2. Have you had any other COVID test during the time you have been in the study?  
If yes: How did you access this test? Why did you have this test carried out?

#### Intentions to act on positive result

##### [For those participants who have had a positive result]

1. How did you feel about the positive result?

- 1
- 2
- 3 2. What happened when you got your positive test?
- 4 Prompts: What did you do next?
- 5 3. Did you have another COVID test?
- 6 Prompts: How did you access this test? When did you have this test?
- 7 4. What were the consequences of you getting a positive result?
- 8 5. How accurate do you think your self-test results have been?
- 9
- 10

11 **Follow up:**

- 12 1. Is there something that you think we didn't cover that is relevant to what we have
- 13 discussed?
- 14 2. Is there anything else you would like to add?
- 15
- 16
- 17
- 18
- 19
- 20
- 21
- 22
- 23
- 24
- 25
- 26
- 27
- 28
- 29
- 30
- 31
- 32
- 33
- 34
- 35
- 36
- 37
- 38
- 39
- 40
- 41
- 42
- 43
- 44
- 45
- 46
- 47
- 48
- 49
- 50
- 51
- 52
- 53
- 54
- 55
- 56
- 57
- 58
- 59
- 60

For peer review only



## Online Questionnaire

### Study Title: The Feasibility and Acceptability of community COVID-19 rapid Testing Strategies (FACTS) study

This survey asks about your views on using tests as part of the FACTS study. This survey takes approximately 5 minutes to complete.

#### Your demographic details

Q1. Please confirm that you are a university:

-student (undergraduate)

-student (postgraduate)

-staff member

Q2. What type of training did you receive? (Face to face training/ Online Training)

Please confirm your email address, by which you received this survey link, so we can link your answers to the demographic information you have already provided in the app.

#### Your symptoms

Since receiving the FACTS training, have you had any of the following symptoms:

a. feeling feverish: (Yes / No)

If yes, when did your symptoms start/end?

b. A new, continuous cough? (New: means a cough that you've not had before, or if you usually have a cough, it's got worse. Continuous: means coughing a lot for more than an hour, or 3 or more coughing episodes in 24 hours) (Yes / No)

If yes, when did your symptoms start/end?

c. Feeling unusually short of breath? (Yes / No)

If yes, when did your symptoms start/end?

d. a loss or change to your sense of smell or taste? (Yes / No)

If yes, when did your symptoms start/end?

e. Feeling usually tired? (Yes / No)

If yes, when did your symptoms start/end?

- 1  
2  
3 f. Feeling so ill that you've stopped doing all of your usual daily activities? Answer unable to do  
4 usual activities if you can't do anything you usually would, such as watch TV, use your  
5 phone, read or get out of bed. (Yes/No)  
6

7 If yes, when did your symptoms start/end?  
8

9 I have had no symptoms since attending the FACTS training (YES/NO).  
10

11 Are you taking any medicines for your symptoms? YES/NO. If yes, please tell us the name of the  
12 medicines [free text]  
13  
14

### 15 Views on testing

16  
17 **Please respond to the statements below using the scale provided. Please give only one answer per**  
18 **statement.**  
19

20 Strongly agree (7), Agree (6), Slightly agree (5), Neither agree nor disagree (4), Slightly disagree (3),  
21 Disagree (2), Strongly disagree (1).  
22

23 I have been provided with [give choice of tests being used in study] self-test.  
24

- 25  
26  
27 1. I believe [The test] provides reliable and accurate results  
28 2. I believe it is safe to use [the test].  
29 3. It is important for me to know whether I have COVID-19 or not  
30

31 Are you carrying out the COVID tests yourself? YES/NO  
32

33 If YES, go to 4  
34

35 If NO, go to 8  
36

- 37 4. Self-testing with [the test] is easy to fit into my usual activities  
38 5. Self-testing with [the test] every [X] days is easy for me to remember to do  
39 6. I am confident I can carry out [the test]  
40 7. I am confident I can interpret [the test] results  
41 8. Testing for COVID weekly is beneficial to me  
42 9. If I have weekly COVID tests it is beneficial to people who live with me  
43 10. If I have weekly COVID tests it is beneficial to my friends and family  
44 11. If I have weekly COVID tests it is beneficial to the wider community  
45 12. I intend to self-test again in the next week.  
46 13. I would self-isolate if I received a positive test result from [the test].  
47 14. I would self-isolate if I received a positive test result from a laboratory (e.g. NHS or  
48 university) test.  
49  
50  
51  
52  
53

54 Please enter any additional comments you have about self-testing for COVID in the free text box  
55 below:  
56

57 Thank you for completing this survey.  
58  
59  
60

1  
2  
3  
4  
5  
6  
7  
8  
9  
10  
11  
12  
13  
14  
15  
16  
17  
18  
19  
20  
21  
22  
23  
24  
25  
26  
27  
28  
29  
30  
31  
32  
33  
34  
35  
36  
37  
38  
39  
40  
41  
42  
43  
44  
45  
46  
47  
48  
49  
50  
51  
52  
53  
54  
55  
56  
57  
58  
59  
60

If you have any queries about this survey please contact [insert researcher’s name and contact details].

For peer review only

1  
2  
3  
4  
5  
6  
7  
8  
9  
10  
11  
12  
13  
14  
15  
16  
17  
18  
19  
20  
21  
22  
23  
24  
25  
26  
27  
28  
29  
30  
31  
32  
33  
34  
35  
36  
37  
38  
39  
40  
41  
42  
43  
44  
45  
46  
47  
48  
49  
50  
51  
52  
53  
54  
55  
56  
57  
58  
59  
60

For peer review only

## COREQ (CONsolidated criteria for REporting Qualitative research) Checklist

A checklist of items that should be included in reports of qualitative research. You must report the page number in your manuscript where you consider each of the items listed in this checklist. If you have not included this information, either revise your manuscript accordingly before submitting or note N/A.

| Topic                                          | Item No. | Guide Questions/Description                                                                                                                              | Reported on Page No. |
|------------------------------------------------|----------|----------------------------------------------------------------------------------------------------------------------------------------------------------|----------------------|
| <b>Domain 1: Research team and reflexivity</b> |          |                                                                                                                                                          |                      |
| <i>Personal characteristics</i>                |          |                                                                                                                                                          |                      |
| Interviewer/facilitator                        | 1        | Which author/s conducted the interview or focus group?                                                                                                   |                      |
| Credentials                                    | 2        | What were the researcher's credentials? E.g. PhD, MD                                                                                                     |                      |
| Occupation                                     | 3        | What was their occupation at the time of the study?                                                                                                      |                      |
| Gender                                         | 4        | Was the researcher male or female?                                                                                                                       |                      |
| Experience and training                        | 5        | What experience or training did the researcher have?                                                                                                     |                      |
| <i>Relationship with participants</i>          |          |                                                                                                                                                          |                      |
| Relationship established                       | 6        | Was a relationship established prior to study commencement?                                                                                              |                      |
| Participant knowledge of the interviewer       | 7        | What did the participants know about the researcher? e.g. personal goals, reasons for doing the research                                                 |                      |
| Interviewer characteristics                    | 8        | What characteristics were reported about the interviewer/facilitator? e.g. Bias, assumptions, reasons and interests in the research topic                |                      |
| <b>Domain 2: Study design</b>                  |          |                                                                                                                                                          |                      |
| <i>Theoretical framework</i>                   |          |                                                                                                                                                          |                      |
| Methodological orientation and Theory          | 9        | What methodological orientation was stated to underpin the study? e.g. grounded theory, discourse analysis, ethnography, phenomenology, content analysis |                      |
| <i>Participant selection</i>                   |          |                                                                                                                                                          |                      |
| Sampling                                       | 10       | How were participants selected? e.g. purposive, convenience, consecutive, snowball                                                                       |                      |
| Method of approach                             | 11       | How were participants approached? e.g. face-to-face, telephone, mail, email                                                                              |                      |
| Sample size                                    | 12       | How many participants were in the study?                                                                                                                 |                      |
| Non-participation                              | 13       | How many people refused to participate or dropped out? Reasons?                                                                                          |                      |
| <i>Setting</i>                                 |          |                                                                                                                                                          |                      |
| Setting of data collection                     | 14       | Where was the data collected? e.g. home, clinic, workplace                                                                                               |                      |
| Presence of non-participants                   | 15       | Was anyone else present besides the participants and researchers?                                                                                        |                      |
| Description of sample                          | 16       | What are the important characteristics of the sample? e.g. demographic data, date                                                                        |                      |
| <i>Data collection</i>                         |          |                                                                                                                                                          |                      |
| Interview guide                                | 17       | Were questions, prompts, guides provided by the authors? Was it pilot tested?                                                                            |                      |
| Repeat interviews                              | 18       | Were repeat interviews carried out? If yes, how many?                                                                                                    |                      |
| Audio/visual recording                         | 19       | Did the research use audio or visual recording to collect the data?                                                                                      |                      |
| Field notes                                    | 20       | Were field notes made during and/or after the interview or focus group?                                                                                  |                      |
| Duration                                       | 21       | What was the duration of the interviews or focus group?                                                                                                  |                      |
| Data saturation                                | 22       | Was data saturation discussed?                                                                                                                           |                      |
| Transcripts returned                           | 23       | Were transcripts returned to participants for comment and/or                                                                                             |                      |

| Topic                                  | Item No. | Guide Questions/Description                                                                                                        | Reported on Page No. |
|----------------------------------------|----------|------------------------------------------------------------------------------------------------------------------------------------|----------------------|
|                                        |          | correction?                                                                                                                        |                      |
| <b>Domain 3: analysis and findings</b> |          |                                                                                                                                    |                      |
| <i>Data analysis</i>                   |          |                                                                                                                                    |                      |
| Number of data coders                  | 24       | How many data coders coded the data?                                                                                               |                      |
| Description of the coding tree         | 25       | Did authors provide a description of the coding tree?                                                                              |                      |
| Derivation of themes                   | 26       | Were themes identified in advance or derived from the data?                                                                        |                      |
| Software                               | 27       | What software, if applicable, was used to manage the data?                                                                         |                      |
| Participant checking                   | 28       | Did participants provide feedback on the findings?                                                                                 |                      |
| <i>Reporting</i>                       |          |                                                                                                                                    |                      |
| Quotations presented                   | 29       | Were participant quotations presented to illustrate the themes/findings?<br>Was each quotation identified? e.g. participant number |                      |
| Data and findings consistent           | 30       | Was there consistency between the data presented and the findings?                                                                 |                      |
| Clarity of major themes                | 31       | Were major themes clearly presented in the findings?                                                                               |                      |
| Clarity of minor themes                | 32       | Is there a description of diverse cases or discussion of minor themes?                                                             |                      |

Developed from: Tong A, Sainsbury P, Craig J. Consolidated criteria for reporting qualitative research (COREQ): a 32-item checklist for interviews and focus groups. *International Journal for Quality in Health Care*. 2007. Volume 19, Number 6: pp. 349 – 357

**Once you have completed this checklist, please save a copy and upload it as part of your submission. DO NOT include this checklist as part of the main manuscript document. It must be uploaded as a separate file.**
