# Supplementary material for: Perceptions on undertaking regular asymptomatic self-testing for COVID-19 using lateral flow tests: a qualitative study of university students and staff
Source: PubMed Central journal article supplement — BMJ Open. 2021 Sep 2;11(9):e053850. doi: 10.1136/bmjopen-2021-053850 (PMC8413471; doi:10.1136/bmjopen-2021-053850), 2021-09-02
Supplement: bmjopen-2021-053850supp001.pdf [file bmjopen-2021-053850supp001.pdf]

## Appendix

### Appendix 1: Topic Guide

#### Topics to be explored

Below is a list of topics to be discussed in this study. The work will remain flexible with respect to participants' agendas. Therefore, we may add new topics as the interviews progress and data collection continues. However, the key topic of participants' views and experiences using the tests, the perceived benefits of testing, barriers and facilitators to undertaking regular testing, trust in test results and intentions to act on positive result, will remain the same.

1. Participants' views and experiences of using the tests.
2. Participants' views and experiences on barriers and facilitators to undertaking regular testing
3. Participants' views on trust in test results.
4. Participants' views and experiences of perceived benefits of testing
5. Participants' intentions to act on positive result.

#### Using the tests

1. Can you tell me about your experience of self-testing for COVID so far?
2. Can you tell me about the training you had on how to self-test, as part of the FACT study?  
Prompts: What did the training involve? What did you think about the training? Is there anything which would make the training easier for you? How confident did you feel about doing the test?
3. How did you feel about doing the test for the first time?
4. How have you found self-testing over time?  
Prompts: Have you had any difficulties in doing the test? If, so what happened and what did you do? How did you overcome difficulties?

#### Barriers and facilitators to undertaking regular testing; perceived benefits of testing

1. Can you tell me why you signed up to this study?
2. How have you found self-testing so far?  
Prompts: What has been most difficult in relation to doing the tests?
3. Is there anything which would making the experience easier for you?
4. What is the main reason for you for continuing in the study?
5. What are the benefits for you in taking part in this study, if any?  
Prompts: Are there benefits for you/your family/your friends?

#### Trust in test results

##### [For those who have not tested positive]

1. How accurate do you think your test results have been?  
Prompts: Have you had any reason to question your test result?
2. Have you had any other COVID test during the time you have been in the study?  
If yes: How did you access this test? Why did you have this test carried out?

#### Intentions to act on positive result

##### [For those participants who have had a positive result]

1. How did you feel about the positive result?

2. What happened when you got your positive test?  
Prompts: What did you do next?
3. Did you have another COVID test?  
Prompts: How did you access this test? When did you have this test?
4. What were the consequences of you getting a positive result?
5. How accurate do you think your self-test results have been?

**Follow up:**

1. Is there something that you think we didn't cover that is relevant to what we have discussed?
2. Is there anything else you would like to add?
